1     **Genetic behavior analysis for phytochemical traits in coriander: Heterosis,**  
2                     **inbreeding depression and genetic effects**

3                     **Amir Gholizadeh<sup>1</sup> and Mostafa Khodadadi<sup>2</sup>**

4             <sup>1</sup>Crop and Horticultural Science Research Department, Golestan Agricultural and Natural  
5     Resources Research and Education Center, Agricultural Research, Education and Extension  
6                     Organization (AREEO), Gorgan, Iran.

7             <sup>2</sup>Seed and Plant Improvement Institute, Agricultural Research Education and Extension  
8                     Organization (AREEO), Karaj, Iran.

9     **Corresponding author**

10    Dr. Amir Gholizadeh

11    Crop and Horticultural Science Research Department, Golestan Agricultural and Natural  
12    Resources Research and Education Center, Agricultural Research, Education and Extension  
13    Organization (AREEO), Gorgan, Iran.

14    E-mail: [a.gholizadeh@areeo.ac.ir](mailto:a.gholizadeh@areeo.ac.ir)



## 1 **Introduction**

2 Coriander (*Coriandrum sativum* L.) is a member of Apiaceae family which has known as  
3 medicinal and industrial plant. Food characteristics caused to cultivate and wide spread of  
4 coriander. It is used for different applications such as food, drugs, cosmetics and perfumery  
5 industry (Neffati and Marzouk, 2008). Coriander fruit contains both fatty acids and essential oils.  
6 A petroselinic acid is a main component of the fatty acid consisting 85% of the total fatty acids.  
7 In industry, petroselinic acid is broken-down into lauric, adipic and C<sub>6</sub> dicarboxylic acids which  
8 are used for synthesizing detergents and nylon polimer (Murphy et al., 1994; Murphy, 1996).  
9 The fatty oil composition of coriander fruit has previously been characterized (Ramadan and  
10 Morsel, 2002; Ramadan and Morsel, 2006; Msaada et al., 2009a; Sriti et al., 2009).

11 The essential oils in coriander have become interesting alternative for other natural components  
12 in food (Wong and Kitts, 2006; Donega et al., 2013). Also, the essential oils are used to flavor or  
13 remove unpleasant odors of some products in food industry (Matasyoh et al., 2009; Neffati and  
14 Marzouk, 2010). Essential oil composition of coriander fruit has previously been quantified  
15 (Msaada et al., 2007; Msaada et al., 2009b; Sriti et al., 2009, Neffati et al., 2011). Coriander  
16 essential oil includes 60-70% linalool has the pleasant characteristics odor (Lubbe and  
17 Verpoorte, 2011). Also, many medicinal properties have been attributed to coriander essential  
18 oil, including antibacterial (Burt, 2004; Lo Cantore et al., 2004), antioxidant (Wangenstein et al.,  
19 2004), antidiabetic (Gallagher et al., 2003) and anticancer (Chithra and Leelamma, 2000) and  
20 anti- antimicrobial activities (Matasyoh et al., 2009; Begnami et al., 2010; Neffati et al., 2011).

21 It was revealed that the amount and composition of substances and secondary metabolites  
22 affected by water deficit stress in some medicinal plants (Charles et al., 1990; Petropoulos et al.,  
23 2008). In some studies, an enhancing effect of water deficit stress on the biosynthesis of essential

1 oils observed (Jaafar et al., 2012; Alinian et al., 2016). Under the stressful growth condition,  
2 secondary metabolites and/or substances production in plants enhanced for preventing an  
3 oxidization in the plant cells. Similarly, under water deficit stress an essential oil content may be  
4 increased. In case of fatty acids, there are evidences about the decreasing effect of water deficit  
5 stress on fatty acids content and yield (Hamrouni et al., 2001; Bettaieb et al., 2009; Bettaieb et  
6 al., 2011). To decrease adverse effects of drought stress on farmers' economy through lowering  
7 the yield of common crops, cultivation of medicinal plants with improved potential of secondary  
8 metabolites production under drought-affected areas could be suggested as an alternative  
9 approach (Alinian et al., 2016).

10 Consideration the statements, for increasing essential oil and fatty acids yield in coriander,  
11 reaching drought-tolerant cultivars with high fruit yield and fatty acids and essential oil content  
12 through plant breeding could be possible. Generally, plant breeding is known as a more stable  
13 approach and a complementary for decreasing the deleterious effects of water deficit stress  
14 through the development of genotypes which can grow and produce suitable essential oil yield  
15 under water deficit stressed environments. Any successful plant improving program depends on  
16 an understanding the nature of gene action involved in the inheritance of that traits under target  
17 growth condition. Griffing's (1956) diallel analysis has used to uncover the behavior of genes  
18 involved in controlling of the traits. This method has also used to estimate variance of GCA and  
19 SCA in different self-pollinated and open-pollinated crops (Khan et al., 2009; Blank et al., 2012;  
20 Townsend et al., 2013; El-Gabry et al., 2014; Khodadadi et al., 2016b; Khodadadi et al., 2017;  
21 Kaushik et al., 2018; Teodoro et al., 2019; Schegoscheski Gerhardt et al., 2019).

22 The heterosis phenomenon in F<sub>1</sub> hybrids can address the SCA and GCA of relevant parents.  
23 Therefore, heterotic breeding search for valuable hybrid combinations which have the

1 commercialization potential. On the other hand, inbreeding depression measures the amount of  
2 vigor reduction in segregating generations due to self-pollination (Joseph and Santhoshkumar,  
3 2000).  
4 Diallel analysis on  $F_1$  crosses has previously been done to estimate genetic parameters and  
5 combining ability in coriander (Khodadadi et al., 2016b). But, it is necessary to uncover the  
6 heterosis, inbreeding depression and repeatability of genetic estimates through  $F_2$  diallel analysis  
7 to establish a successful breeding program for improving coriander fruit quantity and quality  
8 under water limiting conditions in coriander. The objectives of this study were understanding  
9 gene action nature in controlling fruit yield and some phytochemical traits and identifying  
10 heterosis and inbreeding depression potential in coriander under different levels of water  
11 treatment.

## 12 **Materials and methods**

### 13 **Plant material and growth conditions**

14 Genotypes used for making diallel crosses had been evaluated in a preliminary experiment for  
15 drought tolerance by Khodadadi et al. (2016a). The characteristics of selected parental genotypes  
16 were summarized in Table 1. All the six parents contributed to produce 15  $F_1$  hybrids (without  
17 reciprocals) through half diallel mating system in 2015. A part of these  $F_1$  hybrids' seed were  
18 used to produce 15  $F_2$  generations through self-pollination in the isolated condition. All of the six  
19 parents, 15  $F_1$  hybrids and 15  $F_2$  generations were evaluated under three levels of irrigation  
20 regimes. A field trial consisted three experiments close together 1 meter distance. These  
21 experiments were well watered (WW), moderate water deficit stress (MWDS) and severe water  
22 deficit stress (SWDS). Each of these experiments carried out through the randomized complete

1 block design with three replications at the research field of Tarbiat Modares University (51° 09  
2 'E; 35° 44' N; altitude 1265 m), Iran during the growing season of 2017. In WW experiment, a set  
3 of genotypes were well watered overall the experiment period. In MWDS experiment, a set of  
4 genotypes were well watered until an appearance of the stem when watering was withdrawn until  
5 the end of the flowering stage at which point one recovery watering applied. In SWDS  
6 experiment, watering was similar to WW experiment until an appearance of flowering stage and  
7 after which watering was cut off completely. The research field soil physical and chemical  
8 characteristic presented in Table 2.

### 9 **Trait Measurements**

10 The phytochemical traits include essential oil content (EOC), fatty acid content (FAC), essential  
11 oil yield (EOY) and fatty acid yield (FAY), fruit yield per plant (FY) were measured. For  
12 measuring fruit yield of parents and relevant F<sub>1</sub> hybrids 10 plants were harvested from each of  
13 the experimental plots. In F<sub>2</sub> generations 30 plants were harvested from each of the experimental  
14 plots. For extracting the essential oil, 30 g of dried coriander fruits were well powdered and  
15 subjected to hydro-distillation in Clevenger-type apparatus for 120 min. Essential oil content  
16 (%w/w) was computed through the weight (g) of essential oil per 100 g of fruit (Khodadadi et  
17 al., 2016b). Also, essential oil yield was computed through multiplying the essential oil content  
18 by fruit yield per plant (g). For measuring fatty acid content, two grams of powdered fruit sample  
19 of coriander were subjected to Soxhlet apparatus with 250 ml of petroleum ether for 6 h. Fatty  
20 acids were removed after mixture filtration and solvent evaporation under reduced temperature  
21 and pressure (Alinian and Razmjoo, 2014; Khodadadi et al., 2016b). Finally, fatty acid yield was  
22 estimated by multiplying fatty acid content with fruit yield per plant (g) for each plot.

## 1 Statistical analysis

2 The datasets were firstly tested for normality using the Anderson and Darling normality test. The  
3 analysis of variance for GCA and SCA effects were done according to Griffing's (1956) method  
4 2, model 1 using a SAS program suggested by Zhang et al. (2005). Mean values of traits in water  
5 treatments were compared using the least significant difference (LSD) method at 5% level of  
6 probability. Estimates of  $\sigma_g^2$  (general combining ability variance) and  $\sigma_s^2$  (specific combining  
7 ability variance) were computed according to the random-effects model (Zhang et al., 2005). The  
8 GCA /SCA ratio was computed according to the method proposed by Baker (1978) (Equation 1).

$$9 \text{ GCA /SCA}_{\text{ratio}} = \frac{2\sigma_g^2}{2\sigma_g^2 + \sigma_s^2} \quad (1)$$

10 The best parent heterosis was calculated in  $F_1$  hybrids using the formula suggested by Fonseca  
11 and Patterson (1968) (Equation 2).

$$12 \text{ Heterosis} = \frac{F_1 - \text{BP}}{\text{BP}} \quad (2)$$

13 where  $F_1$  and BP are target hybrid and best parent values, respectively. Also, the observed  
14 inbreeding depression (ID) was estimated as a percent of the decrease in  $F_2$  mean when  
15 compared with  $F_1$  hybrid mean according to the formula suggested by Khan et al. (2009)  
16 (Equation 3). The  $\bar{F}_1$  is the mean value of  $F_1$  hybrid and  $\bar{F}_2$  is the mean value of  $F_2$  generations  
17 mean of parents.

$$18 \text{ ID(\%)} = \frac{\bar{F}_2 - \bar{F}_1}{\bar{F}_1} \times 100 \quad (3)$$

19 All statistical analysis were done using Statistical Analysis System (SAS) (SAS Institute, 1992)  
20 and graphs generated using Excel Microsoft Office Software.

## 1 **Results and discussion**

### 2 **Combined analysis of variance for traits under water treatments**

3 The combined analysis of variance revealed the presence of a significant difference between  
4 water treatments for all of traits in both F<sub>1</sub> hybrids and F<sub>2</sub> generations (Table 3). There was a  
5 high significant difference between F<sub>1</sub> hybrids and also between F<sub>2</sub> generations for all of studied  
6 traits. These observations indicate that parent selection for diallel crosses had been properly  
7 done. Along with the main water treatment and genotype effects, the genotype × water treatment  
8 interaction effect was significant for all traits in both F<sub>1</sub> hybrids and F<sub>2</sub> generations (Table 3).  
9 Being significant genotype (F<sub>1</sub> hybrids + F<sub>2</sub> generations) × water treatment interaction refers to  
10 different growth response of genotypes in differently watered growth conditions.

11 Analysis of variance for genetic effects revealed that both additive and non-additive gene actions  
12 are involved in the expression of traits in both F<sub>1</sub> hybrids and F<sub>2</sub> generations. Also, significant  
13 GCA × environment and SCA × environment interactions effect for all traits in both F<sub>1</sub> and F<sub>2</sub>  
14 generations (Table 3) reveal that general combining ability of parents and specific combining  
15 ability of hybrids were differently determined by additive and non-additive gene actions under  
16 different water treatments, respectively. Therefore, selection for parent with high GCA or hybrid  
17 with high SCA should be done according to the condition of target cultivating environment.

### 18 **Effect of water deficit stress on measured traits**

19 Generally, results indicated that fruit yield, essential oil yield, fatty oil content and fatty oil yield  
20 were negatively affected by water deficit stress in both F<sub>1</sub> hybrids and F<sub>2</sub> generations in  
21 coriander. But essential oil content was significantly increased under water deficit stress. (Table  
22 4).



## 1 **Effect of water deficit stress on fruit yield**

2 As shown in table 4, fruit yield was significantly affected by water treatments. The highest fruit  
3 yield obtained in well-watered condition while the minimum fruit yield obtained in severe water  
4 deficit stress in both F<sub>1</sub> hybrids and F<sub>2</sub> generations. A reduction in fruit yield of coriander under  
5 water deficit condition also reported by Nadjafi et al. (2009) and Khodadadi et al. (2016b). In  
6 other aromatic and medicinal crops, similar results observed by Zehtab-Salmasi et al. (2006) in  
7 dill (*Anethum graveolens* L.), Bannayan et al. (2008) in *Plantago ovata* and *Nigella sativa*, Laribi  
8 et al. (2009) in caraway (*Carum carvi* L.), Ekren et al. (2012) in purple basil (*Ocimum basilicum*  
9 L.) and Alinian and Razmjoo (2014) in cumin under drought stress condition. A fruit yield  
10 reduction under drought stress occurred through insufficient photosynthesis due to stomata  
11 closure and thereafter a reduction in CO<sub>2</sub> uptake (Rebey et al., 2012), shortening flowering and  
12 fruit setting periods and preferential allocation of assimilates to the roots rather than the shoots  
13 (Alinian and Razmjoo, 2014).

## 14 **Effect of water deficit stress on essential oil content and essential oil yield**

15 The largest value of essential oil content obtained in the moderate water deficit stress while the  
16 lowest essential oil content recorded in well-watered for both F<sub>1</sub> hybrids and F<sub>2</sub> generations.  
17 Results indicate that drought stress has a positive effect on the essential oil content in coriander.  
18 Increasing in the essential oil content by progress in drought stress has also been documented by  
19 Baher et al. (2002) in *Satureja hortensis* L., Yassen et al. (2003) in *Ocimum basilicum* L.,  
20 Omidbaigi et al. (2003) in sweet basil, Dunford and Vazquez (2005) in Mexican oregano, Khalid  
21 (2006) in *Ocimum basilicum* L. and *Ocimum americanum* L., Petropoulos et al. (2008) in  
22 parsley, Bettaiebet al. (2009) in *Salvia officinalis* L., Ekren et al. (2012) in *Ocimum basilicum* L.  
23 and Alinian et al. (2014) in cumin.

1 Whereas, drought stress leads to decrease in essential oil yield in both F<sub>1</sub> hybrids and F<sub>2</sub>  
2 generations (Table 4). So that the highest value of essential oil yield obtained in the well-watered  
3 condition and the lowest essential oil yield observed in severe water deficit stress for both F<sub>1</sub>  
4 hybrids and F<sub>2</sub> generations (Table 4). Similar results were reported by Singh and Ramesh (2000),  
5 Zehtab-salmasi et al. (2001), Farahani et al. (2009) and Alinian and Razmjoo (2014). Essential  
6 oil yield depends on essential oil content and fruit yield. Because drought stress had a more  
7 reducing effect on fruit yield rather than an increasing effect on essential oil content, therefore,  
8 essential oil yield reduced under water deficit stress conditions (Farahani et al., 2009).

### 9 **Effect of water deficit stress on fatty oil content and yield**

10 The largest fatty oil content and yield values obtained in well-watered and the least fatty oil  
11 content and fatty oil yield values were obtained in severe water deficit stress for both F<sub>1</sub> hybrids  
12 and F<sub>2</sub> populations. Similarly, Singh and Ramesh (2000) in rosemary, Zehtab-Salmasi et al.  
13 (2006) in dill (*Anethum graveolens* L.), Hamrouni et al. (2001) in safflower, Bettaieb et al.  
14 (2009) in *Salvia officinalis* L. and Bettaieb et al. (2011) in cumin (*Cuminum cyminum* L.)  
15 observed that the significant decreasing effect of water deficit stress on fatty oil content and fatty  
16 oil yield.

### 17 **Nature of gene action**

18 A significant GCA and SCA variances for all traits in both F<sub>1</sub> hybrids and F<sub>2</sub> populations indicate  
19 that both additive and non-additive gene actions are contributed to determine these traits.  
20 Khodadadi et al. (2016b) reported that both non-additive and additive gene actions for the  
21 inheritance of different traits are important in coriander.

1 GCA/SCA ratio reflects the degree of trait which transmitted to the progeny. When the  
2 GCA/SCA ratio are closer to unit and zero show that additive and non-additive gene actions are  
3 mostly involved in inheritance of the trait, respectively. Consideration the GCA/SCA ratio, non-  
4 additive gene action was predominant for fruit yield, essential oil yield and fatty oil yield traits in  
5  $F_1$  and  $F_2$  generations under well-watered condition (Table 5). The same gene action in  $F_1$  and  $F_2$   
6 may be because of coupling phase linkage (Ramachandram and Goud, 1981). In advanced  
7 generations, when a coupling linkage present, additive genetic variance decrease and when the  
8 repulsion linkage present, additive genetic variance increase Robinson et al. (1960). Therefore, to  
9 improve fruit yield, essential oil yield and fatty oil yield traits under well-watered condition,  
10 selection should be delayed to the later generations of segregation. For fatty oil content, non-  
11 additive gene action nature was predominant in  $F_1$  hybrids, while in  $F_2$  generations the additive  
12 genetic effects were more important under well-watered condition (Table 5). The inconsistency  
13 in  $F_1$  and  $F_2$  results is due to the breakdown of dominance effects and gen linkages. Also,  
14 essential oil content was predominantly governed by additive gene action in both  $F_1$  hybrids and  
15  $F_2$  generations. Presence of mostly additive gene action in  $F_2$  generation for fatty oil content and  
16 in both  $F_1$  and  $F_2$  generations for essential oil content suggests that selection programs can be  
17 effective in the  $F_2$  and later generations for improvement of fatty oil content and essential oil  
18 content traits under well-watered conditions.

19 In severe water deficit stress, results of GCA/SCA ratio for fruit yield showed that non-additive  
20 type of gene action was predominant in both  $F_1$  hybrids and  $F_2$  populations (Table 5). Therefore,  
21 to improve fruit yield under severe water deficit stress condition, selection should be delayed to  
22 the later generations of segregation to loss of non-additive gene actions. For fruit yield under  
23 moderate water deficit stress and essential oil content, fatty oil content, essential oil yield and

1 fatty oil yield under both moderate and severe water deficit stress conditions, the non-additive  
2 gene action in  $F_1$  hybrids while an additive gene action in  $F_2$  generation were more important  
3 (Table 5). Therefore, breeding programs based on selection can be effective in the  $F_2$  and later  
4 generations for improvement of these traits under water deficit stress.

## 5 **Mean performance, heterosis and inbreeding depression**

### 6 **Fruit yield**

7 In well-watered condition, fruit yield varied from 2.40 ( $P_6$ ) to 9.71 g ( $P_2$ ) between the parents  
8 and ranged from 5.26 to 18.10 g ( $H_2 \times 4$ ) between the  $F_1$  hybrids (Fig. 1A). Parental genotypes of  
9 the  $H_2 \times 4$  had approximately half yield (6.80–9.71 g) as compared to their hybrid. In  $F_2$   
10 generation, the fruit yield varied from 3.75 to 10.71 g between the hybrids (Fig. 1A). Similar to  
11  $F_1$  generation, in  $F_2$  the highest fruit yield obtained by  $H_2 \times 4$ . Also, in  $F_1$  generations, almost all  
12 hybrids exhibited positive heterosis (7.82–115.40 %) in which  $P_4$  involved hybrids mostly  
13 showed high heterosis (+80.91 to +89.74 %). Inbreeding depression from  $F_1$  hybrids to  $F_2$   
14 generations ranged from -7.94 % to -42.80 % for fruit yield (Fig. 1A).

15 In moderate water deficit stress condition, fruit yield varied from 1.14 ( $P_5$ ) to 5.27 g ( $P_4$ ) between  
16 the parents and ranged from 1.17 to 10.03 g between the  $F_1$  hybrids (Fig. 1B). A large fruit yield  
17 obtained in five  $F_1$  hybrids including  $H_4 \times 6$  (10.03 g),  $H_1 \times 4$  (9.58 g),  $H_2 \times 4$  (8.93 g),  $H_4 \times 5$  (8.71 g)  
18 and  $H_3 \times 4$  (8.85 g). In  $F_2$  generation, fruit yield varied from 1.08 to 9.29 g (Fig. 1B).  $F_2$   
19 generations relevant to the high yielding  $F_1$  hybrids also exhibited the highest fruit yield. When  
20  $P_4$  and  $P_6$  contributed as one of the mating partners, the large heterosis vigor obtained (+107.40  
21 % to +159.59 %). Inbreeding depression from  $F_1$  hybrids to  $F_2$  populations had larger range for  
22 fruit yield (-0.36 % to -26.05 %) in moderate water deficit stress than well-watered (Fig. 1B).

1 In severe water deficit stress, fruit yield varied from 0.58 (P<sub>5</sub>) to 2.24 g (P<sub>6</sub>) between parents and  
2 from 0.22 to 4.77 g between F<sub>1</sub> hybrids (Fig. 1C). In F<sub>2</sub> generation, fruit yield varied from 0.21 to  
3 4.28 g (Fig. 1C) and a large fruit yield obtained from F<sub>2</sub> populations derived from the P<sub>4</sub> and P<sub>6</sub>  
4 contributed hybrids. The heterosis values for fruit yield ranged between -64.68 and +154.54 %  
5 (Fig. 1C) and many of the hybrids exposed positive heterosis. Similar to moderate water deficit  
6 stress, inbreeding depression from F<sub>1</sub> hybrids to F<sub>2</sub> populations in severe water stress showed  
7 larger range (-0.59 to -22.66 %) than well-watered (Fig. 1C).

8 Higher heterosis and lower inbreeding depression in water deficit stressed conditions than those  
9 in well-watered condition reveal that the respective parents of hybrids probably were carriers of  
10 drought tolerance alleles could be homozygous recessive (Musembi et al., 2015). Therefore, their  
11 hybrids appeared superior in water deficit stressed conditions compared with the high yielding  
12 hybrids being superior in well water. In case of inbreeding depression from F<sub>1</sub> hybrids to F<sub>2</sub>  
13 generations, the heterozygote loci can maximally be 50 % breakdown. Therefore, an appearance  
14 of drought tolerance in F<sub>2</sub> generations could yet be kept by heterozygote genes.

## 15 **Essential oil content**

16 In well-watered treatment, the essential oil content ranged from 0.140 % (P<sub>2</sub>) to 0.550 % (P<sub>4</sub>)  
17 between the parents and from 0.250 to 0.563 % between the F<sub>1</sub> hybrids (Fig. 2A). The highest  
18 essential oil content obtained in five hybrids of P<sub>4</sub> (0.440–0.563 %), followed by H<sub>1</sub>×<sub>3</sub> hybrid. In  
19 F<sub>2</sub> generation, essential oil content ranged from 0.237 to 0.545% (Fig. 2A) and five of the F<sub>2</sub>  
20 populations that a P<sub>4</sub> was one of mating partner exposed the highest essential oil content (0.431–  
21 0.545 %). In F<sub>1</sub> generation (Fig. 2A) many of hybrids showed positive heterosis (+2.42 to +62.20  
22 %). Also, all the F<sub>2</sub> populations showed inbreeding depression (-2.07 to -9.06 %) (Fig. 2A).

1 In moderate water deficit stress, the essential oil content ranged from 0.257% (P<sub>5</sub>) to 0.653 %  
2 (P<sub>4</sub>) between the parents and from 0.343 to 0.997 % between the F<sub>1</sub> hybrids (Fig. 2B). The  
3 highest essential oil content recorded in five hybrids relevant to P<sub>4</sub> (0.667–0.997 %). In F<sub>2</sub>  
4 generation, essential oil content ranged from 0.258 to 0.907 % between the populations (Fig. 2B)  
5 and similar to the F<sub>1</sub> hybrids, five populations derived from P<sub>4</sub> showed the highest essential oil  
6 content (0.542-0.907 %). In F<sub>1</sub> generation all crosses exposed positive heterosis (+2.04 to +63.74  
7 %) (Fig. 2B). Also, almost all the F<sub>2</sub> populations showed inbreeding depression (−9.00 to −36.52  
8 %) (Fig. 2B).

9 In severe water deficit stress, the essential oil content ranged from 0.227 % (P<sub>5</sub>) to 0.580 % (P<sub>4</sub>)  
10 between the parents and from 0.320 to 0.770 % between the F<sub>1</sub> hybrids (Fig. 2C). The highest  
11 essential oil content obtained by five hybrids of P<sub>4</sub> (0.593–0.770 %). In F<sub>2</sub> generation, essential  
12 oil content was 0.191–0.560 % between the cross populations (Fig. 2C) and five derivatives of P<sub>4</sub>  
13 showed high essential oil content (0.499–0.560 %). In F<sub>1</sub> generation all hybrids showed positive  
14 heterosis (+2.30 to +74.12 %) and all of the F<sub>2</sub> populations showed inbreeding depression  
15 (−15.89 to −40.38 %) (Fig. 2C).

16 The ranges of heterosis and inbreeding depression were higher in water deficit stressed  
17 conditions compare to the well water condition. Generally, high heterosis along with high  
18 inbreeding depression refers the presence of genes with non-additive action and high heterosis  
19 along with the least inbreeding depression indicates the presence of genes with additive action  
20 (Shukla and Gautam, 1990). Low inbreeding depression in well water condition suggests that  
21 increased vigor of F<sub>1</sub>s in such cases are expected to be mainly due to an accumulation of  
22 favorable additive action genes. Also, high inbreeding depression in water deficit stress condition  
23 indicates that non-additive action genes play major role in the inheritance of essential oil content.

1 Our results are in accordance with previous researches on inbreeding depression under water  
2 deficit stressed conditions (Cheptou et al., 2000; Armbruster and Reed, 2005). In  $F_2$ , even after  
3 inbreeding depression, some crosses exhibited good performance indicating the potential of these  
4 crosses to develop high essential oil content cultivars. The derivatives of the  $P_4$  parent displayed  
5 better mean performance as compared to their parents even after segregation and inbreeding  
6 depression. Therefore,  $P_4$  population could be used in the segregating generations to obtain  
7 genotypes with high essential oil content under different water treatments.

### 8 **Fatty oil content**

9 In well-water, fatty oil content varied from 15.33 ( $P_4$ ) to 22 % ( $P_6$ ) between the parents and  
10 ranged from 16.33 to 26.67 % between the  $F_1$  hybrids (Fig. 3A). The highest fatty oil content  
11 recorded for hybrids of  $P_6$  ( $H_{1 \times 6}$  (26.67 %),  $H_{4 \times 6}$  (26.0 %),  $H_{3 \times 6}$  (25.0 %) and  $H_{2 \times 6}$  (23.0 %))  
12 followed by  $H_{1 \times 4}$  hybrid. Parental genotypes of these promising hybrids also had nearly high  
13 fatty oil content (18.33–22.0 %). In  $F_2$  generation, the fatty oil content varied from 14.94 to  
14 22.54 % between the populations (Fig. 3A). The highest fatty oil content obtained in  $F_2$   
15 generation by  $P_6$  hybrids and followed  $H_{1 \times 4}$ ,  $H_{2 \times 5}$ ,  $H_{1 \times 2}$  hybrids. In  $F_1$  generation, heterosis  
16 ranged from +0.00 to +36.36 % for fatty oil content (Fig. 3A) and in  $F_2$  generation, inbreeding  
17 depression for fatty oil content observed from -8.32 to -25.75 % (Fig. 3A).

18 In moderate water deficit stress, the fatty oil content varied from 11.67 ( $P_2$ ) to 25.33 % ( $P_6$ ) and  
19 15.00 to 25.0 % between parents and  $F_1$  hybrids, respectively (Fig. 3B). The highest fatty oil  
20 content observed in eight  $F_1$  hybrids that  $P_6$  involved in four crosses. In  $F_2$  generation, fatty oil  
21 content varied from 14.68 to 25.98 % between hybrids (Fig. 3B) and the highest fatty oil content  
22 (22.89–25.98 %) recorded for three hybrids of  $P_6$ . The heterosis values for fatty oil content were

1 +1.96 to +33.33 % (Fig. 3B) and almost all hybrids showed positive heterosis. F<sub>2</sub> populations  
2 showed inbreeding depression for fatty oil content (-2.03 to -16.37 %) (Fig. 3B).  
3 In severe water deficit stress, the fatty oil content varied from 10.33 (P<sub>2</sub>) to 19.67 % (P<sub>6</sub>) and  
4 13.33 to 22.67 % between parents and F<sub>1</sub> hybrids, respectively (Fig. 3C). The highest fatty oil  
5 content were recorded in F<sub>1</sub> hybrids involving P<sub>6</sub> and followed by H<sub>1</sub>×<sub>4</sub> hybrid. In F<sub>2</sub> generation,  
6 fatty oil content varied from 12.85 to 20.41 % between the hybrids (Fig. 3C) and the highest fatty  
7 oil content was obtained from hybrids of P<sub>6</sub>. The heterosis values for fatty oil content ranged  
8 from +4.26 to +30.77 % (Fig. 3C) and many of hybrids showed positive heterosis. The F<sub>2</sub>  
9 generations displayed inbreeding depression (-3.64 to -13.30 %) for fatty oil content (Fig. 3C).  
10 Overall, it was revealed that P<sub>6</sub> involved F<sub>2</sub> populations could be utilize for developing cultivars  
11 with high fatty oil content under different water treatments.  
12 The ranges of heterosis and inbreeding depression were higher in well-watered than water  
13 stressed conditions. High heterosis is well-known to be a result of the effects of non-additive  
14 genes (Shalaby, 2013; Solieman et al., 2013; Singh et al., 2014). Therefore, the higher heterosis  
15 and inbreeding depression in well water condition suggest that non-additive gene actions were  
16 more predominant in well water condition compare to the water deficit stressed conditions. F<sub>2</sub>  
17 progenies derived from P<sub>6</sub> contributed hybrids showed better mean performance even after  
18 inbreeding depression than their parents indicating the presence of transgressive segregation for  
19 fatty oil content under different water treatments.

## 20 **Essential oil yield and fatty oil yield**

21 In well-watered treatment, the essential oil yield ranged from 0.005 (P<sub>6</sub>) to 0.037 g (P<sub>4</sub>) among  
22 the parents and from 0.014 to 0.096 g between the F<sub>1</sub> hybrids (Fig. 4A). High essential oil yield  
23 was obtained for four P<sub>4</sub> crosses (0.057–0.096 g). In F<sub>2</sub> generation, essential oil yield ranged



1 from 0.010–0.055 g between the cross generations (Fig. 4A) and four crosses of P<sub>4</sub> showed a  
2 high essential oil yield (0.033–0.055 g). In F<sub>1</sub> generation (Fig. 4A) almost all crosses indicated  
3 positive heterosis for essential oil yield (+7.48 to +213.91 %). Also, all of the F<sub>2</sub> populations  
4 showed inbreeding depression (–15.06 to –47.80 %) (Fig. 4A).

5 In moderate water stress, the essential oil yield ranged from 0.003 (P<sub>2</sub>) to 0.034 g (P<sub>4</sub>) between  
6 the parents and from 0.005 to 0.087 g between the F<sub>1</sub> hybrids (Fig. 4B). Highest essential oil  
7 yield was recorded for five P<sub>4</sub> crosses (0.058–0.087 g), followed by H<sub>1</sub>×<sub>6</sub>, H<sub>3</sub>×<sub>6</sub>, H<sub>5</sub>×<sub>6</sub> hybrids. In  
8 F<sub>2</sub> generation, essential oil yield ranged from 0.003–0.061 g between the cross population (Fig.  
9 4B) and similar to the F<sub>1</sub> generation, crosses of P<sub>4</sub> showed highest essential oil yield (0.036–  
10 0.061 g). In F<sub>1</sub> generation all crosses showed positive heterosis (+11.22 to +226.33 %) (Fig. 4B).  
11 Also, almost all of the F<sub>2</sub> populations showed inbreeding depression for essential oil yield (–6.88  
12 to –44.40 %) (Fig. 4B).

13 In severe water stress, the essential oil yield ranged from 0.002 (P<sub>5</sub>) to 0.010 g (P<sub>4</sub>) between the  
14 parents and from 0.001 to 0.032 g between the F<sub>1</sub> hybrids (Fig. 4C). The highest essential oil  
15 yield was obtained in crosses of P<sub>4</sub> (0.021–0.032 g), followed by H<sub>1</sub>×<sub>6</sub>, H<sub>3</sub>×<sub>6</sub>, H<sub>5</sub>×<sub>6</sub> hybrids. In F<sub>2</sub>  
16 generation, essential oil yield ranged from 0.001–0.023 g between the cross generations (Fig.  
17 4C) and progenies of P<sub>4</sub> and P<sub>6</sub> showed the highest essential oil yield. In F<sub>1</sub> generation, almost all  
18 crosses displayed positive heterosis (+26.01 to +208.31 %) (Fig. 4C). The F<sub>2</sub> generation showed  
19 inbreeding depression (–21.96 to –40.85 %) (Fig. 4C). Overall, results indicated that P<sub>4</sub>  
20 population could be used in the segregating generations to obtain genotypes with essential oil  
21 yield potential under different water treatments.

22 In well-water, the fatty oil yield varied from 1.12 to 3.41 g between parents and F<sub>1</sub> hybrids (Fig.  
23 5A). The highest fatty oil yield was obtained from H<sub>2</sub>×<sub>4</sub>, H<sub>1</sub>×<sub>4</sub> hybrids. In F<sub>2</sub> generation, fatty oil

1 yield varied from 0.71 to 1.82 g between the generations (Fig. 5A) and highest fatty oil yield was  
2 noticed in generations derived from the hybrids of P<sub>4</sub>. The heterosis values for fatty oil yield  
3 were ranged from -26.95 to +204.96 % (Fig. 5A) and all hybrids showed positive heterosis. F<sub>2</sub>  
4 populations displayed inbreeding depression for fatty oil yield (-21.88 to -49.31 %) (Fig. 5A).  
5 In moderate water stress, the fatty oil yield ranged from 0.13 (P<sub>2</sub>) to 0.85 g (P<sub>4</sub>) between the  
6 parents and from 0.24 to 2.48 g between the F<sub>1</sub> hybrids (Fig. 5B). High values of fatty oil yield  
7 were recorded in hybrids involving P<sub>4</sub> and P<sub>6</sub>. In F<sub>2</sub> generation, fatty oil yield ranged from 0.20–  
8 0.2.27 g between the cross generations (Fig. 5B) and the crosses of P<sub>4</sub> and P<sub>6</sub> showed high fatty  
9 oil yield. In F<sub>1</sub> generation (Fig. 5B) almost all of the hybrids showed positive heterosis (+3.42 to  
10 +191.18 %). Also, almost all of the F<sub>2</sub> population showed inbreeding depression (-4.14 to  
11 -31.64 %) (Fig. 5B).  
12 In severe water stress, the fatty oil yield varied from 0.06 (P<sub>2</sub>) to 0.45 g (P<sub>6</sub>) and 0.04 to 1.04 g  
13 between parents and F<sub>1</sub> hybrids, respectively (Fig. 5C). High values of the fatty oil yield were  
14 recorded in F<sub>1</sub> hybrids involving P<sub>6</sub> and followed by hybrids of P<sub>4</sub>. In F<sub>2</sub> generation, fatty oil  
15 yield varied from 0.03 to 0.89 g between the generations (Fig. 5C) and high values of the fatty  
16 oil yield was obtained from hybrids of P<sub>6</sub>. The heterosis values of fatty oil yield ranged from  
17 +35.04 to +185.27 % (Fig. 5C) and many of the hybrids showed positive heterosis. The F<sub>2</sub>  
18 populations showed inbreeding depression (-4.53 to -27.02 %) (Fig. 5C). Overall, results  
19 indicated that P<sub>6</sub> and P<sub>4</sub> population could be used in the segregating generations to obtain  
20 genotypes with high fatty oil yield potential under different water treatments.  
21 Inbreeding depression was higher in well water condition compare to water deficit stressed  
22 conditions for essential oil yield and fatty oil yield indicating that inbreeding depression was  
23 unstable across environments. Also, results revealed the higher heterosis values for essential oil

1 yield and fatty oil yield than other traits indicating that non-additive genes were more responsible  
2 for the expression of these traits. These findings can be confirmed by the results of the  
3 GCA/SCA ratio in Table 5.

4 The utilization of hybrid vigor is one of the ways to improve yield in plant breeding. The  
5 existence of considerable degree of natural outcrossing had made these possible to use genetic  
6 diversity through production heterotic hybrids (Saxena *et al.*, 1990). In coriander, heterosis  
7 cannot be exploited for higher production through commercial hybrids due to the nature of  
8 flower and poor seed recovery during hybridization. But estimation of heterosis for fruit yield,  
9 fatty oil and essential oils content will help in recognition crosses that can lead to isolate of  
10 advanced promising lines in segregating generation in coriander. Also, estimation of heterosis  
11 coupled with inbreeding depression shows that whether an amount of the vigor observed in  
12 segregating generations can be fixed in later generations by self-pollinating (Joseph and  
13 Santhoshkumar, 2000). The results showed that there was a positive heterosis for the traits  
14 examined in coriander which is an evidence for the existence of potential heterosis in Iranian  
15 coriander. In present study, the significant SCA effect indicates that there was non-additive gene  
16 effect, which could be the cause of the heterosis on the progenies observed and selection will not  
17 be effective in early generations. Hence, selection could be practiced in advance generations  
18 confirming to earlier reports.

19 The results showed that many of the F<sub>2</sub> population exposed inbreeding depression and it was  
20 higher for fruit yield, essential oil yield and fatty oil yield. Inbreeding depression mostly was  
21 higher in hybrids with high performing than hybrids with low and moderate performing. Soomro  
22 and Kalhoro (2000), Khan *et al.* (2007) and Khan *et al.* (2009) reported that F<sub>1</sub> hybrids with high  
23 performing were also correlated with higher inbreeding depression. Showing heterosis in F<sub>1</sub> and

1 inbreeding depression in  $F_2$  reveal the nature of gene action involved in the expression of the  
2 vigor in  $F_1$  and depression in  $F_2$ . In  $F_2$  generation, the offspring's of the parental genotypes  $P_4$   
3 and  $P_6$  displayed better mean performance as compared to their parents and the selection in these  
4 crosses can provide transgressive gene recombinants for studied traits.  $P_4$  and  $P_6$  crosses are  
5 required to be subjected to the pedigree/progeny selection directly for reaching to the high  
6 potential cultivars. Also,  $P_4$  and  $P_6$  parents can be used as source of elite parents for synthetic  
7 cultivars (Khan et al., 2007; Khan et al., 2009) in coriander.

## 8 **Conclusion**

9 Results indicated that water deficit stress negatively affected the fruit yield, essential oil yield,  
10 fatty oil content and fatty oil yield of coriander in both  $F_1$  and  $F_2$  generations. On the contrary,  
11 water deficit stress significantly increased the essential oil content of the coriander. Analysis of  
12 variance for genetic combining ability indicate that mean square due to GCA and SCA for all  
13 traits were highly significant in both  $F_1$  and  $F_2$  generations. Revealing the importance of additive  
14 and non-additive genetic nature in the expression of all traits in both  $F_1$  and  $F_2$  generations.  
15 Under water deficit stress conditions, non-additive gene action was predominant for studied traits  
16 in  $F_1$ , while additive gene effects were more important in  $F_2$  generations except for fruit yield  
17 under severe water deficit stress. These results indicate that selection programs can be effective  
18 in the  $F_2$  and later generations ( $F_3$  or  $F_4$ ) for improvement of the studied traits under water deficit  
19 stress conditions. Also, for improvement of fruit yield under severe water deficit stress, selection  
20 should be delayed to later generations ( $F_3$  or  $F_4$ ) of segregation for dissipation of non-additive  
21 gene action. There was a positive heterosis in coriander for all traits. In  $F_2$ , even after inbreeding  
22 depression, some promising generations displayed good performance and selection in such

1 crosses can provide a better base for future. The progenies of the P<sub>4</sub> and P<sub>6</sub> parents displayed  
2 better mean performance as compared to their parents and the selection in these crosses provided  
3 transgressive gene recombinants for studied traits. It is also indicated that combined performance  
4 of F<sub>1</sub> hybrids and F<sub>2</sub> populations could be an appropriate criterion to recognizing the most  
5 promising populations to be used either as F<sub>2</sub> hybrids or as a resource population for further  
6 selection in advanced generations.

## 7 **References**

- 8 Alinian, S., Razmjoo, J., 2014. Phenological, yield, essential oil yield and oil content of cumin  
9 accessions as affected by irrigation regimes. *Ind. Crop. Prod.* 54, 167-174.
- 10 Alinian, S., Razmjoo, J., Zeinali, H., 2016. Flavonoids, anthocynins, phenolics and essential oil  
11 produced in cumin (*Cuminum cyminum* L.) accessions under different irrigation regimes. *Ind.*  
12 *Crop. Prod.* 81, 49-55.
- 13 Armbruster, P., Reed, D., 2005. Inbreeding depression in benign and stressful environments.  
14 *Heredity* 95, 235-242.
- 15 Baher, Z.F., Mirza, M., Ghorbanli, M., Bagher Rezaii, M., 2002. The influence of water stress on  
16 plant height, herbal and essential oil yield and composition in *Satureja hortensis* L. *Flavour*  
17 *Fragr. J.* 17, 275-277.
- 18 Baker, R., 1978. Issues in diallel analysis. *Crop Sci.* 18, 533-536.
- 19 Bannayan, M., Nadjafi, F., Azizi, M., Tabrizi, L., Rastgoo, M., 2008. Yield and seed quality of  
20 *Plantago ovata* and *Nigella sativa* under different irrigation treatments. *Ind. Crop. Prod.* 27,  
21 11-16.

- 1 Begnami, A., Duarte, M., Furletti, V., Rehder, V., 2010. Antimicrobial potential of *Coriandrum*  
2 *sativum* L. against different *Candida* species in vitro. *Food Chem.* 118, 74-77.
- 3 Bettaieb, I., Knioua, S., Hamrouni, I., Limam, F., Marzouk, B., 2011. Water-deficit impact on  
4 fatty acid and essential oil composition and antioxidant activities of cumin (*Cuminum*  
5 *cuminum* L.) aerial parts. *J. Agr. Food Chem.* 59, 328-334.
- 6 Bettaieb, I., Zakhama, N., Wannas, W.A., Kchouk, M., Marzouk, B., 2009. Water deficit effects  
7 on *Salvia officinalis* fatty acids and essential oils composition. *Sci. Hortic.* 120, 271-275.
- 8 Blank, A.F., Santa Rosa, Y.R., de Carvalho Filho, J.L.S., dos Santos, C.A., de Fátima Arrigoni-  
9 Blank, M., dos Santos Niculau, E., Alves, P.B., 2012. A diallel study of yield components  
10 and essential oil constituents in basil (*Ocimum basilicum* L.). *Ind. Crop. Prod.* 38, 93-98.
- 11 Burt, S., 2004. Essential oils: their antibacterial properties and potential applications in foods—a  
12 review. *Int. J. Food Microbiol.* 94, 223-253.
- 13 Charles, D.J., Joly, R.J., Simon, J.E., 1990. Effects of osmotic stress on the essential oil content  
14 and composition of peppermint. *Phytochemistry* 29, 2837-2840.
- 15 Cheptou, P.O., Berger, A., Blanchard, A., Collin, C., Escarre, J., 2000. The effect of drought  
16 stress on inbreeding depression in four populations of the Mediterranean outcrossing plant  
17 *Crepis sancta* (Asteraceae). *Heredity* 85, 294-302.
- 18 Chithra, V., Leelamma, S., 2000. *Coriandrum sativum*—effect on lipid metabolism in 1, 2-  
19 dimethyl hydrazine induced colon cancer. *J. Ethnopharmacol.* 71, 457-463.
- 20 Donega, M.A., Mello, S.C., Moraes, R.M., Cantrell, C.L., 2013. Nutrient uptake, biomass yield  
21 and quantitative analysis of aliphatic aldehydes in cilantro plants. *Ind. Crop. Prod.* 44, 127-  
22 131.

- 1 Dunford, N.T., Vazquez, R.S., 2005. Effect of water stress on plant growth and thymol and  
2 carvacrol concentrations in Mexican oregano grown under controlled conditions. *J. Appl.*  
3 *Hortic.* 7, 20-22.
- 4 Ekren, S., Sönmez, Ç., Özçakal, E., Kurttaş, Y.S.K., Bayram, E., Gürgülü, H., 2012. The effect  
5 of different irrigation water levels on yield and quality characteristics of purple basil  
6 (*Ocimum basilicum* L.). *Agri. water manage.* 109, 155-161.
- 7 El-Gabry, M., Solieman, T., Abido, A., 2014. Combining ability and heritability of some tomato  
8 (*Solanum lycopersicum* L.) cultivars. *Sci. Hort.* 167, 153-157.
- 9 Farahani, H.A., Valadabadi, S.A., Daneshian, J., Shiranirad, A.H., Khalvati, M.A., 2009.  
10 Medicinal and aromatic plants farming under drought conditions. *J. Hort. Forest.* 1, 086-  
11 092.
- 12 Farooq, M., Wahid, A., Kobayashi, N., Fujita, D., Basra, S., 2009. Plant drought stress: effects,  
13 mechanisms and management. *Agron. Sustain. Dev.* 29, 185-212.
- 14 Fonseca, S., Patterson, F.L., 1968. Hybrid vigor in a seven-parent diallel cross in common winter  
15 wheat (*Triticum aestivum* L.). *Crop Sci.* 8, 85-88.
- 16 Gallagher, A., Flatt, P., Duffy, G., Abdel-Wahab, Y., 2003. The effects of traditional antidiabetic  
17 plants on in vitro glucose diffusion. *Nut. Res.* 23, 413-424.
- 18 Griffing, B., 1956. A generalized treatment of the use of diallel crosses in quantitative  
19 inheritance. *Heredity* 10, 31-50.
- 20 Hamrouni, I., Salah, H.B., Marzouk, B., 2001. Effects of water-deficit on lipids of safflower  
21 aerial parts. *Phytochemistry* 58, 277-280.
- 22 Jaafar, H.Z., Ibrahim, M.H., Mohamad Fakri, N.F., 2012. Impact of soil field water capacity on  
23 secondary metabolites, phenylalanine ammonia-lyase (PAL), malondialdehyde (MDA) and

- 1        photosynthetic responses of Malaysian Kacip Fatimah (*Labisia pumila* Benth). *Molecules* 17,  
2        7305-7322.
- 3        Joseph, J., Santhoshkumar, A., 2000. Heterosis and inbreeding depression in green gram (*Vigna*  
4        *radiata* L. Wilczek). *Legume Res.* 23, 118-121.
- 5        Kaushik, P., Plazas, M., Prohens, J., Vilanova, S. and Gramazio, P. (2018). Diallel genetic  
6        analysis for multiple traits in eggplant and assessment of genetic distances for predicting  
7        hybrids performance. *Plos one*, 13: e0199943.
- 8        Khalid, K.A., 2006. Influence of water stress on growth, essential oil, and chemical composition  
9        of herbs (*Ocimum* sp.). *Int. Agrophys.* 20, 289-296.
- 10        Khan, N.U., Hassan, G., Kumbhar, M.B., Kang, S., Khan, I., Parveen, A., Aiman, U., 2007.  
11        Heterosis and inbreeding depression and mean performance in segregating generations in  
12        upland cotton. *Eur. J. Sci. Res.* 17, 531–546.
- 13        Khan, N.U., Hassan, G., Kumbhar, M.B., Marwat, K.B., Khan, M.A., Parveen, A., Saeed, M.,  
14        2009. Combining ability analysis to identify suitable parents for heterosis in seed cotton  
15        yield, its components and lint % in upland cotton. *Ind. Crop. Prod.* 29, 108-115.
- 16        Khodadadi, M., Dehghani, H., Jalali-Javaran, M., 2017. Quantitative genetic analysis reveals  
17        potential to genetically improve fruit yield and drought resistance simultaneously in  
18        coriander. *Front. Plant Sci.* 8, 568.
- 19        Khodadadi, M., Dehghani, H., Jalali-Javaran, M., Rashidi-Monfared, S., Christopher, J.T.,  
20        2016a. Numerical and graphical assessment of relationships between traits of the Iranian  
21        *Coriandrum sativum* L. core collection by considering genotype × irrigation interaction. *Sci.*  
22        *Hortic.* 200, 73-82.



- 1 Khodadadi, M., Dehghani, H., Javaran, M.J., Christopher, J.T., 2016b. Fruit yield, fatty and  
2 essential oils content genetics in coriander. *Ind. Crop. Prod.* 94, 72-81.
- 3 Laribi, B., Bettaieb, I., Kouki, K., Sahli, A., Mougou, A., Marzouk, B., 2009. Water deficit  
4 effects on caraway (*Carum carvi* L.) growth, essential oil and fatty acid composition. *Ind.*  
5 *Crop. Prod.* 30, 372-379.
- 6 Lo Cantore, P., Iacobellis, N.S., De Marco, A., Capasso, F., Senatore, F., 2004. Antibacterial  
7 activity of *Coriandrum sativum* L. and *Foeniculum vulgare* Miller var. *vulgare* (Miller)  
8 essential oils. *J. Agri. Food Chem.* 52, 7862-7866.
- 9 Lubbe, A., Verpoorte, R., 2011. Cultivation of medicinal and aromatic plants for specialty  
10 industrial materials. *Ind. Crop. Prod.* 34, 785-801.
- 11 Matasyoh, J., Maiyo, Z., Ngure, R., Chepkorir, R., 2009. Chemical composition and  
12 antimicrobial activity of the essential oil of *Coriandrum sativum*. *Food Chem.* 113, 526-529.
- 13 Msaada, K., Hosni, K., Taarit, M.B., Chahed, T., Hammami, M., Marzouk, B., 2009a. Changes  
14 in fatty acid composition of coriander (*Coriandrum sativum* L.) fruit during maturation. *Ind.*  
15 *Crop. Prod.* 29, 269-274.
- 16 Msaada, K., Hosni, K., Taarit, M.B., Chahed, T., Kchouk, M.E., Marzouk, B., 2007. Changes on  
17 essential oil composition of coriander (*Coriandrum sativum* L.) fruits during three stages of  
18 maturity. *Food Chem.* 102, 1131-1134.
- 19 Msaada, K., Taarit, M.B., Hosni, K., Hammami, M., Marzouk, B., 2009b. Regional and  
20 maturational effects on essential oils yields and composition of coriander (*Coriandrum*  
21 *sativum* L.) fruits. *Sci. Hortic.* 122, 116-124.
- 22 Murphy, D.J., 1996. Engineering oil production in rapeseed and other oil crops. *Trends.*  
23 *Biotechnol.* 14, 206-213.

- 1 Murphy, D.J., Richards, D., Taylor, R., Capdevielle, J., Guillemot, J.C., Grison, R., Fairbairn, D.,  
2 Bowra, S., 1994. Manipulation of seed oil content to produce industrial crops. *Ind. Crops.*  
3 *Prod.* 3, 17-27.
- 4 Musembi, K.B., Githiri, S.M., Yecho, G.C., Sibiya, J., 2015. Combining ability and heterosis  
5 for yield and drought tolerance traits under managed drought stress in sweet potato.  
6 *Euphytica* 201, 423-440.
- 7 Nadjafi, F., Damghani, A.M., Ebrahimi, S.N., 2009. Effect of irrigation regimes on yield, yield  
8 components, content and composition of the essential oil of four Iranian land races of  
9 coriander (*Coriandrum sativum*). *J. Essent. Oil Bear. Pl.* 12, 300-309.
- 10 Neffati, M., Marzouk, B., 2008. Changes in essential oil and fatty acid composition in coriander  
11 (*Coriandrum sativum* L.) leaves under saline conditions. *Ind. Crop. Prod.* 28, 137-142.
- 12 Neffati, M., Marzouk, B., 2010. Salinity impact on growth, essential oil content and composition  
13 of coriander (*Coriandrum sativum* L.) stems and leaves. *J. Essent. Oil Bear. Pl.* 22, 29-34.
- 14 Neffati, M., Sriti, J., Hamdaoui, G., Kchouk, M.E., Marzouk, B., 2011. Salinity impact on fruit  
15 yield, essential oil composition and antioxidant activities of *Coriandrum sativum* fruit  
16 extracts. *Food Chem.* 124, 221-225.
- 17 Omidbaigi, R., Hassani, A., Sefidkon, F., 2003. Essential oil content and composition of sweet  
18 basil (*Ocimum basilicum*) at different irrigation regimes. *J. Essent. Oil Bear. Pl.* 6, 104-108.
- 19 Petropoulos, S., Daferera, D., Polissiou, M., Passam, H., 2008. The effect of water deficit stress  
20 on the growth, yield and composition of essential oils of parsley. *Sci. Hortic.* 115, 393-397.
- 21 Ramachandram, M., Goud, J., 1981. Genetic analysis of seed yield, oil content and their  
22 components in safflower (*Carthamus tinctorius* L.). *Theor. Appl. Genet.* 60, 191-195.

- 1 Ramadan, M., Morsel, J.T., 2002. Oil composition of coriander (*Coriandrum sativum* L.) fruit-  
2 seeds. Eur. Food Res. Technol. 215, 204-209.
- 3 Ramadan, M.F., Morsel, J.T., 2006. Screening of the antiradical action of vegetable oils. J. Food  
4 Compos. Anal. 19, 838-842.
- 5 Rebey, I.B., Jabri-Karoui, I., Hamrouni-Sellami, I., Bourgou, S., Limam, F., Marzouk, B., 2012.  
6 Effect of drought on the biochemical composition and antioxidant activities of cumin  
7 (*Cuminum cyminum* L.) seeds. Ind. Crop. Prod. 36, 238-245.
- 8 Rieseberg, L.H., Archer, M.A., Wayne, R.K., 1999. Transgressive segregation, adaptation and  
9 speciation. Heredity 83, 363-372.
- 10 Robinson, H., Cockerham, C.C., Moll, R., 1960. Studies on estimation of dominance variance  
11 and effects of linkage bias. Biometrical genetics. Pergamon Press, New York, 171-177.
- 12 SAS Institute Inc., 1992. SAS Technical Report. SAS statistics Software: Changes and  
13 Enhancements. Release 6.07. SAS Institute Inc., Cary, North Carolina.
- 14 Saxena, K., Singh, L., Gupta, M., 1990. Variation for natural out-crossing in pigeonpea.  
15 Euphytica 46, 143-148.
- 16 Schegoscheski Gerhardt, I. F., Teixeira do Amaral Junior, A., Ferreira Pena, G., Moreira  
17 Guimarães, L. J., de Lima, V. J., Vivas, M., Araújo Diniz Santos, P. H., Alves Ferreira, F. R.,  
18 Mendonça Freitas, M. S. and Kamphorst, S. H. (2019). Genetic effects on the efficiency and  
19 responsiveness to phosphorus use in popcorn as estimated by diallel analysis. Plos one, 14:  
20 e0216980.
- 21 Shalaby, T. A., 2013. Mode of gene action, heterosis and inbreeding depression for yield and its  
22 components in tomato (*Solanum lycopersicum* L.). Sci. Hortic. 164, 540-543.

- 1 Shukla, A., Gautam, N., 1990. Heterosis and inbreeding depression in okra (*Abelmoschus*  
2 *esculentus* L. Moench.). Indian J. Hortic. 47, 85-88.
- 3 Singh, M., Ramesh, S., 2000. Effect of irrigation and nitrogen on herbage, oil yield and water-  
4 use efficiency in rosemary grown under semi-arid tropical conditions. J. Med. Aromatic Plant  
5 Sci. 22, 659-662.
- 6 Singh, P., Cheema, D., Dhaliwal, M., Garg, N., 2014. Heterosis and combining ability for  
7 earliness, plant growth, yield and fruit attributes in hot pepper (*Capsicum annuum* L.)  
8 involving genetic and cytoplasmic-genetic male sterile lines. Sci. Hortic. 168, 175-188.
- 9 Solieman, T., El-Gabry, M., Abido, A., 2013. Heterosis, potence ratio and correlation of some  
10 important characters in tomato (*Solanum lycopersicum* L.). Sci. Hortic. 150, 25-30.
- 11 Soomro, A., Kalhor, A., 2000. Hybrid vigor (F<sub>1</sub>) and inbreeding depression (F<sub>2</sub>) for some  
12 economic traits in crosses between glandless and glanded cotton. Pak. J. Biol. Sci. 3, 2013-  
13 2015.
- 14 Sriti, J., Talou, T., Wannas, W.A., Cerny, M., Marzouk, B., 2009. Essential oil, fatty acid and  
15 sterol composition of Tunisian coriander fruit different parts. J. Sci. Food. Agr. 89, 1659-  
16 1664.
- 17 Teodoro, L. P. R., Bhering, L. L., Gomes, B. E. L., Campos, C. N. S., Baio, F. H. R., Gava, R.,  
18 da Silva Júnior, C. A. and Teodoro, P. E. (2019). Understanding the combining ability for  
19 physiological traits in soybean. Plos one, 14: e0226523.
- 20 Townsend, T., Segura, V., Chigeza, G., Penfield, T., Rae, A., Harvey, D., Bowles, D. and  
21 Graham, I. A. (2013). The use of combining ability analysis to identify elite parents for  
22 *Artemisia annua* F1 hybrid production. Plos one, 8: e61989.

- 1 Turtola, S., Manninen, A.-M., Rikala, R., Kainulainen, P., 2003. Drought stress alters the  
2 concentration of wood terpenoids in Scots pine and Norway spruce seedlings. *J. Chem. Ecol.*  
3 29, 1981-1995.
- 4 Wangensteen, H., Samuelson, A.B., Malterud, K.E., 2004. Antioxidant activity in extracts from  
5 coriander. *Food Chem.* 88, 293-297.
- 6 Wong, P.Y., Kitts, D.D., 2006. Studies on the dual antioxidant and antibacterial properties of  
7 parsley (*Petroselinum crispum*) and cilantro (*Coriandrum sativum*) extracts. *Food Chem.* 97,  
8 505-515.
- 9 Yassen, M., Ram, P., Yadav, A., Singh, K., 2003. Response of Indian basil (*Ocimum basilicum*)  
10 to irrigation and nitrogen schedule in Central Uttar Pradesh. *Ann. Plant Physiol.* 17, 177-181.
- 11 Zehtab-Salmasi, S., Ghassemi-Golez, K., Moghbeli, S., 2006. Effect of sowing date and limited  
12 irrigation on the seed yield and quality of dill (*Anethum graveolens* L.). *Turk. J. Agric. For.*  
13 30, 281-286.
- 14 Zhang, Y., Kang, M.S., Lamkey, K.R., 2005. DIALLEL-SAS05: a comprehensive program for  
15 Griffing's and Gardner-Eberhart analyses. *Agron. J.* 97, 1097-1106.

1

**Table 1.** Coriander genotypes and their characteristics.

| Genotype   | Parental code  | Characteristics                               |
|------------|----------------|-----------------------------------------------|
| Commercial | P <sub>1</sub> | Drought susceptible                           |
| TN-59-353  | P <sub>2</sub> | Relatively drought tolerant                   |
| TN-59-80   | P <sub>3</sub> | Drought susceptible                           |
| TN-59-160  | P <sub>4</sub> | Drought tolerant and relatively high yielding |
| TN-59-158  | P <sub>5</sub> | Highly drought susceptible                    |
| TN-59-230  | P <sub>6</sub> | Highly drought tolerant but low yielding      |

2

**Table 2.** Soil properties of different layers of the experimental field.

| Soil depth (cm) | Sand (%) | Silt (%) | Clay (%) | Bulk density (g cm <sup>-3</sup> ) | FC (%) | Organic matter (%) | pH   | EC (dS m <sup>-1</sup> ) |
|-----------------|----------|----------|----------|------------------------------------|--------|--------------------|------|--------------------------|
| 0-20            | 70       | 15       | 15       | 1.2                                | 16.5   | 1.61               | 7.75 | 1.3                      |
| 20-40           | 68       | 18       | 14       | 1.4                                | 19     | 1.45               | 7.75 | 1.28                     |
| 40-60           | 66       | 18       | 16       | 1.48                               | 15     | 1.09               | 7.74 | 1.26                     |

FC, soil moisture at field capacity.

**Table 3.** Combined analysis of variance for phytochemical traits in the F<sub>1</sub> and F<sub>2</sub> generations under water treatments

| Source               | df  | Mean Squares   |                |                      |                      |                |                |                       |                       |                |                |
|----------------------|-----|----------------|----------------|----------------------|----------------------|----------------|----------------|-----------------------|-----------------------|----------------|----------------|
|                      |     | FY             |                | EOC                  |                      | FOC            |                | EOY                   |                       | FOY            |                |
|                      |     | F <sub>1</sub> | F <sub>2</sub> | F <sub>1</sub>       | F <sub>2</sub>       | F <sub>1</sub> | F <sub>2</sub> | F <sub>1</sub>        | F <sub>2</sub>        | F <sub>1</sub> | F <sub>2</sub> |
| Water treatment (WT) | 2   | 771.31**       | 332.34**       | 0.53**               | 0.193**              | 223.12**       | 111.27**       | 0.008**               | 0.004**               | 35.08**        | 11.53**        |
| Replication (WT)     | 6   | 13.60          | 12.55          | 0.43 E <sup>-3</sup> | 0.33 E <sup>-3</sup> | 5.02           | 3.68           | 0.42 E <sup>-3</sup>  | 0.26 E <sup>-3</sup>  | 0.70           | 0.53           |
| Genotype (G)         | 20  | 45.60**        | 21.64**        | 0.23**               | 0.167**              | 102.71**       | 63.95**        | 0.003**               | 0.14 E <sup>-2</sup>  | 2.25**         | 0.93**         |
| G × WT               | 40  | 14.75**        | 6.27**         | 0.02**               | 0.015**              | 6.13**         | 7.10**         | 0.6 E <sup>-3**</sup> | 0.2 E <sup>-3**</sup> | 0.60**         | 0.23**         |
| GCA                  | 5   | 61.74**        | 40.78**        | 0.59**               | 0.553**              | 219.99**       | 182.17**       | 0.007**               | 0.004**               | 2.51**         | 1.64**         |
| SCA                  | 15  | 40.22**        | 15.26**        | 0.11**               | 0.038**              | 63.61**        | 24.54**        | 0.002**               | 0.6 E <sup>-3**</sup> | 2.16**         | 0.69**         |
| GCA × WT             | 10  | 35.18**        | 19.27**        | 0.02**               | 0.022**              | 8.65**         | 13.54**        | 0.001**               | 0.6 E <sup>-3**</sup> | 1.13**         | 0.69**         |
| SCA × WT             | 30  | 7.94**         | 1.94**         | 0.01**               | 0.012**              | 5.29**         | 4.95**         | 0.4 E <sup>-3**</sup> | 0.1 E <sup>-3**</sup> | 0.42**         | 0.08*          |
| Error                | 120 | 1.12           | 1.10           | 0.54 E <sup>-3</sup> | 0.87 E <sup>-3</sup> | 1.98           | 2.09           | 3.87 E <sup>-5</sup>  | 3.1 E <sup>-5</sup>   | 0.05           | 0.05           |

\*\* and \* are significant at 1% and 5% levels of probability, respectively. Fruit yield (FY), essential oil content (EOC), essential oil yield (EOY), fatty oil content (FOC), fatty oil yield (FOY).

**Table 4.** The mean of traits under different irrigation treatments in F<sub>1</sub> and F<sub>2</sub> generations of coriander.

| Water treatment         | FY                |                   | EOC                |                    | FOC                |                    | EOY                |                    | FOY               |                   |
|-------------------------|-------------------|-------------------|--------------------|--------------------|--------------------|--------------------|--------------------|--------------------|-------------------|-------------------|
|                         | F <sub>1</sub>    | F <sub>2</sub>    | F <sub>1</sub>     | F <sub>2</sub>     | F <sub>1</sub>     | F <sub>2</sub>     | F <sub>1</sub>     | F <sub>2</sub>     | F <sub>1</sub>    | F <sub>2</sub>    |
| Well-watered            | 9.19 <sup>a</sup> | 6.74 <sup>a</sup> | 0.351 <sup>c</sup> | 0.337 <sup>c</sup> | 20.59 <sup>a</sup> | 18.35 <sup>a</sup> | 0.035 <sup>a</sup> | 0.023 <sup>a</sup> | 1.88 <sup>a</sup> | 1.22 <sup>a</sup> |
| Moderate water Stressed | 4.51 <sup>b</sup> | 3.94 <sup>b</sup> | 0.530 <sup>a</sup> | 0.446 <sup>a</sup> | 18.60 <sup>b</sup> | 17.76 <sup>b</sup> | 0.029 <sup>b</sup> | 0.021 <sup>a</sup> | 0.87 <sup>b</sup> | 0.73 <sup>b</sup> |
| Severe water Stressed   | 2.35 <sup>c</sup> | 2.18 <sup>c</sup> | 0.477 <sup>b</sup> | 0.377 <sup>b</sup> | 16.83 <sup>c</sup> | 15.81 <sup>c</sup> | 0.013 <sup>c</sup> | 0.009 <sup>b</sup> | 0.43 <sup>c</sup> | 0.37 <sup>c</sup> |

In each column the values with common letters do not differ significantly. Fruit yield (FY), essential oil content (EOC), essential oil yield (EOY), fatty oil content (FOC), fatty oil yield (FOY).

**Table 5.** Analysis of variance for combining ability, variance components and GCA/SCA ratio.

| Water treatment       | Estimate     | FY                 |                | EOC            |                | FOC                |                | EOY                   |                | FOY                |                     |
|-----------------------|--------------|--------------------|----------------|----------------|----------------|--------------------|----------------|-----------------------|----------------|--------------------|---------------------|
|                       |              | F <sub>1</sub>     | F <sub>2</sub> | F <sub>1</sub> | F <sub>2</sub> | F <sub>1</sub>     | F <sub>2</sub> | F <sub>1</sub>        | F <sub>2</sub> | F <sub>1</sub>     | F <sub>2</sub>      |
| Well Watered          | GCA          | 31.82**            | 13.86**        | 0.131**        | 0.128**        | 59.34**            | 30.62**        | 0.002**               | 0.001**        | 16.25**            | 8.30**              |
|                       | SCA          | 21.19**            | 4.85**         | 0.018**        | 0.014**        | 28.44**            | 6.88**         | 0.001**               | 0.26 E-3**     | 26.53**            | 6.08**              |
|                       | Error        | 1.65               | 1.42           | 0.45 E-3       | 0.41 E-3       | 2.33               | 2.19           | 3.4 E-5               | 2.24 E-5       | 0.08               | 0.05                |
|                       | $\sigma_g^2$ | 2.21 <sup>ns</sup> | 0.53*          | 0.005**        | 0.005**        | 1.29 <sup>ns</sup> | 0.99**         | 4.5 E-5 <sup>ns</sup> | 3.64 E-5**     | 0.03 <sup>ns</sup> | 0.004 <sup>ns</sup> |
|                       | $\sigma_s^2$ | 18.21**            | 1.83**         | 0.006**        | 0.004**        | 8.70**             | 1.56**         | 0.4 E-3**             | 7.96 E-5**     | 0.64**             | 0.08**              |
|                       | GCA/SCA      | 0.12               | 0.37           | 0.62           | 0.68           | 0.23               | 0.56           | 0.18                  | 0.48           | 0.09               | 0.10                |
| Moderate Water Stress | GCA          | 65.85**            | 48.31**        | 0.323**        | 0.307**        | 101.93**           | 119.15**       | 0.006**               | 0.003**        | 2.873**            | 2.147**             |
|                       | SCA          | 16.30**            | 8.64**         | 0.074**        | 0.041**        | 23.03**            | 16.00**        | 0.001**               | 5.3 E-4**      | 0.791**            | 0.448**             |
|                       | Error        | 0.90               | 1.14           | 0.001          | 0.001          | 1.68               | 1.70           | 5.3 E-5               | 5.0 E-5        | 0.049              | 0.071               |
|                       | $\sigma_g^2$ | 2.06*              | 1.65**         | 0.010*         | 0.011**        | 3.29*              | 4.30**         | 1.8 E-4*              | 1.2 E-4*       | 0.006*             | 0.003**             |
|                       | $\sigma_s^2$ | 5.13**             | 2.50**         | 0.025**        | 0.013**        | 7.12**             | 4.77**         | 4.6 E-4**             | 1.6 E-4**      | 0.009**            | 0.003**             |
|                       | GCA/SCA      | 0.45               | 0.57           | 0.46           | 0.62           | 0.48               | 0.64           | 0.44                  | 0.60           | 0.41               | 0.53                |
| Severe Water Stress   | GCA          | 13.62**            | 11.30**        | 0.177**        | 0.161**        | 76.03**            | 59.48**        | 6.4 E-4**             | 3.9 E-4**      | 0.68**             | 0.48**              |
|                       | SCA          | 4.75**             | 3.58**         | 0.044**        | 0.008**        | 22.73**            | 11.56**        | 2.3 E-4**             | 8.4 E-5**      | 0.20**             | 0.12**              |
|                       | Error        | 0.80               | 0.75           | 0.001          | 0.001          | 1.94               | 2.37           | 2.9 E-5               | 2.1 E-5        | 0.03               | 0.03                |
|                       | $\sigma_g^2$ | 0.37*              | 0.32*          | 0.006*         | 0.006**        | 2.22*              | 2.00**         | 1.7 E-5*              | 1.3 E-5**      | 0.02*              | 0.02**              |
|                       | $\sigma_s^2$ | 1.32**             | 0.94**         | 0.014**        | 0.002**        | 6.93**             | 3.06**         | 6.6 E-5**             | 2.1 E-5**      | 0.06**             | 0.03**              |
|                       | GCA/SCA      | 0.36               | 0.40           | 0.44           | 0.86           | 0.39               | 0.57           | 0.35                  | 0.55           | 0.41               | 0.57                |

\*\* , \* and <sup>ns</sup> are significant at 1% and 5% level of probability and not significant, respectively. General combining ability (GCA), specific combining ability (SCA), fruit yield (FY), essential oil content (EOC), essential oil yield (EOY), fatty oil content (FOC), fatty oil yield (FOY).



3 **Figure captions:**

4 **Fig. 1.** Mean, heterosis and inbreeding depression for fruit yield in F<sub>1</sub> and F<sub>2</sub> generations of  
5 coriander crosses. **A:** Well Watered, **B:** Moderate Water Stress, **C:** Severe Water Stress

6 **Fig. 2.** Mean, heterosis and inbreeding depression for essential oil content in F<sub>1</sub> and F<sub>2</sub>  
7 generations of coriander crosses. **A:** Well Watered, **B:** Moderate Water Stress, **C:** Severe Water  
8 Stress

9 **Fig. 3.** Mean, heterosis and inbreeding depression for fatty oil content in F<sub>1</sub> and F<sub>2</sub> generations of  
10 coriander crosses. **A:** Well Watered, **B:** Moderate Water Stress, **C:** Severe Water Stress

11 **Fig. 4.** Mean, heterosis and inbreeding depression for essential oil yield in F<sub>1</sub> and F<sub>2</sub> generations  
12 of coriander crosses. **A:** Well Watered, **B:** Moderate Water Stress, **C:** Severe Water Stress

13 **Fig. 5.** Mean, heterosis and inbreeding depression for fatty oil yield in F<sub>1</sub> and F<sub>2</sub> generations of  
14 coriander crosses. **A:** Well Watered, **B:** Moderate Water Stress, **C:** Severe Water Stress

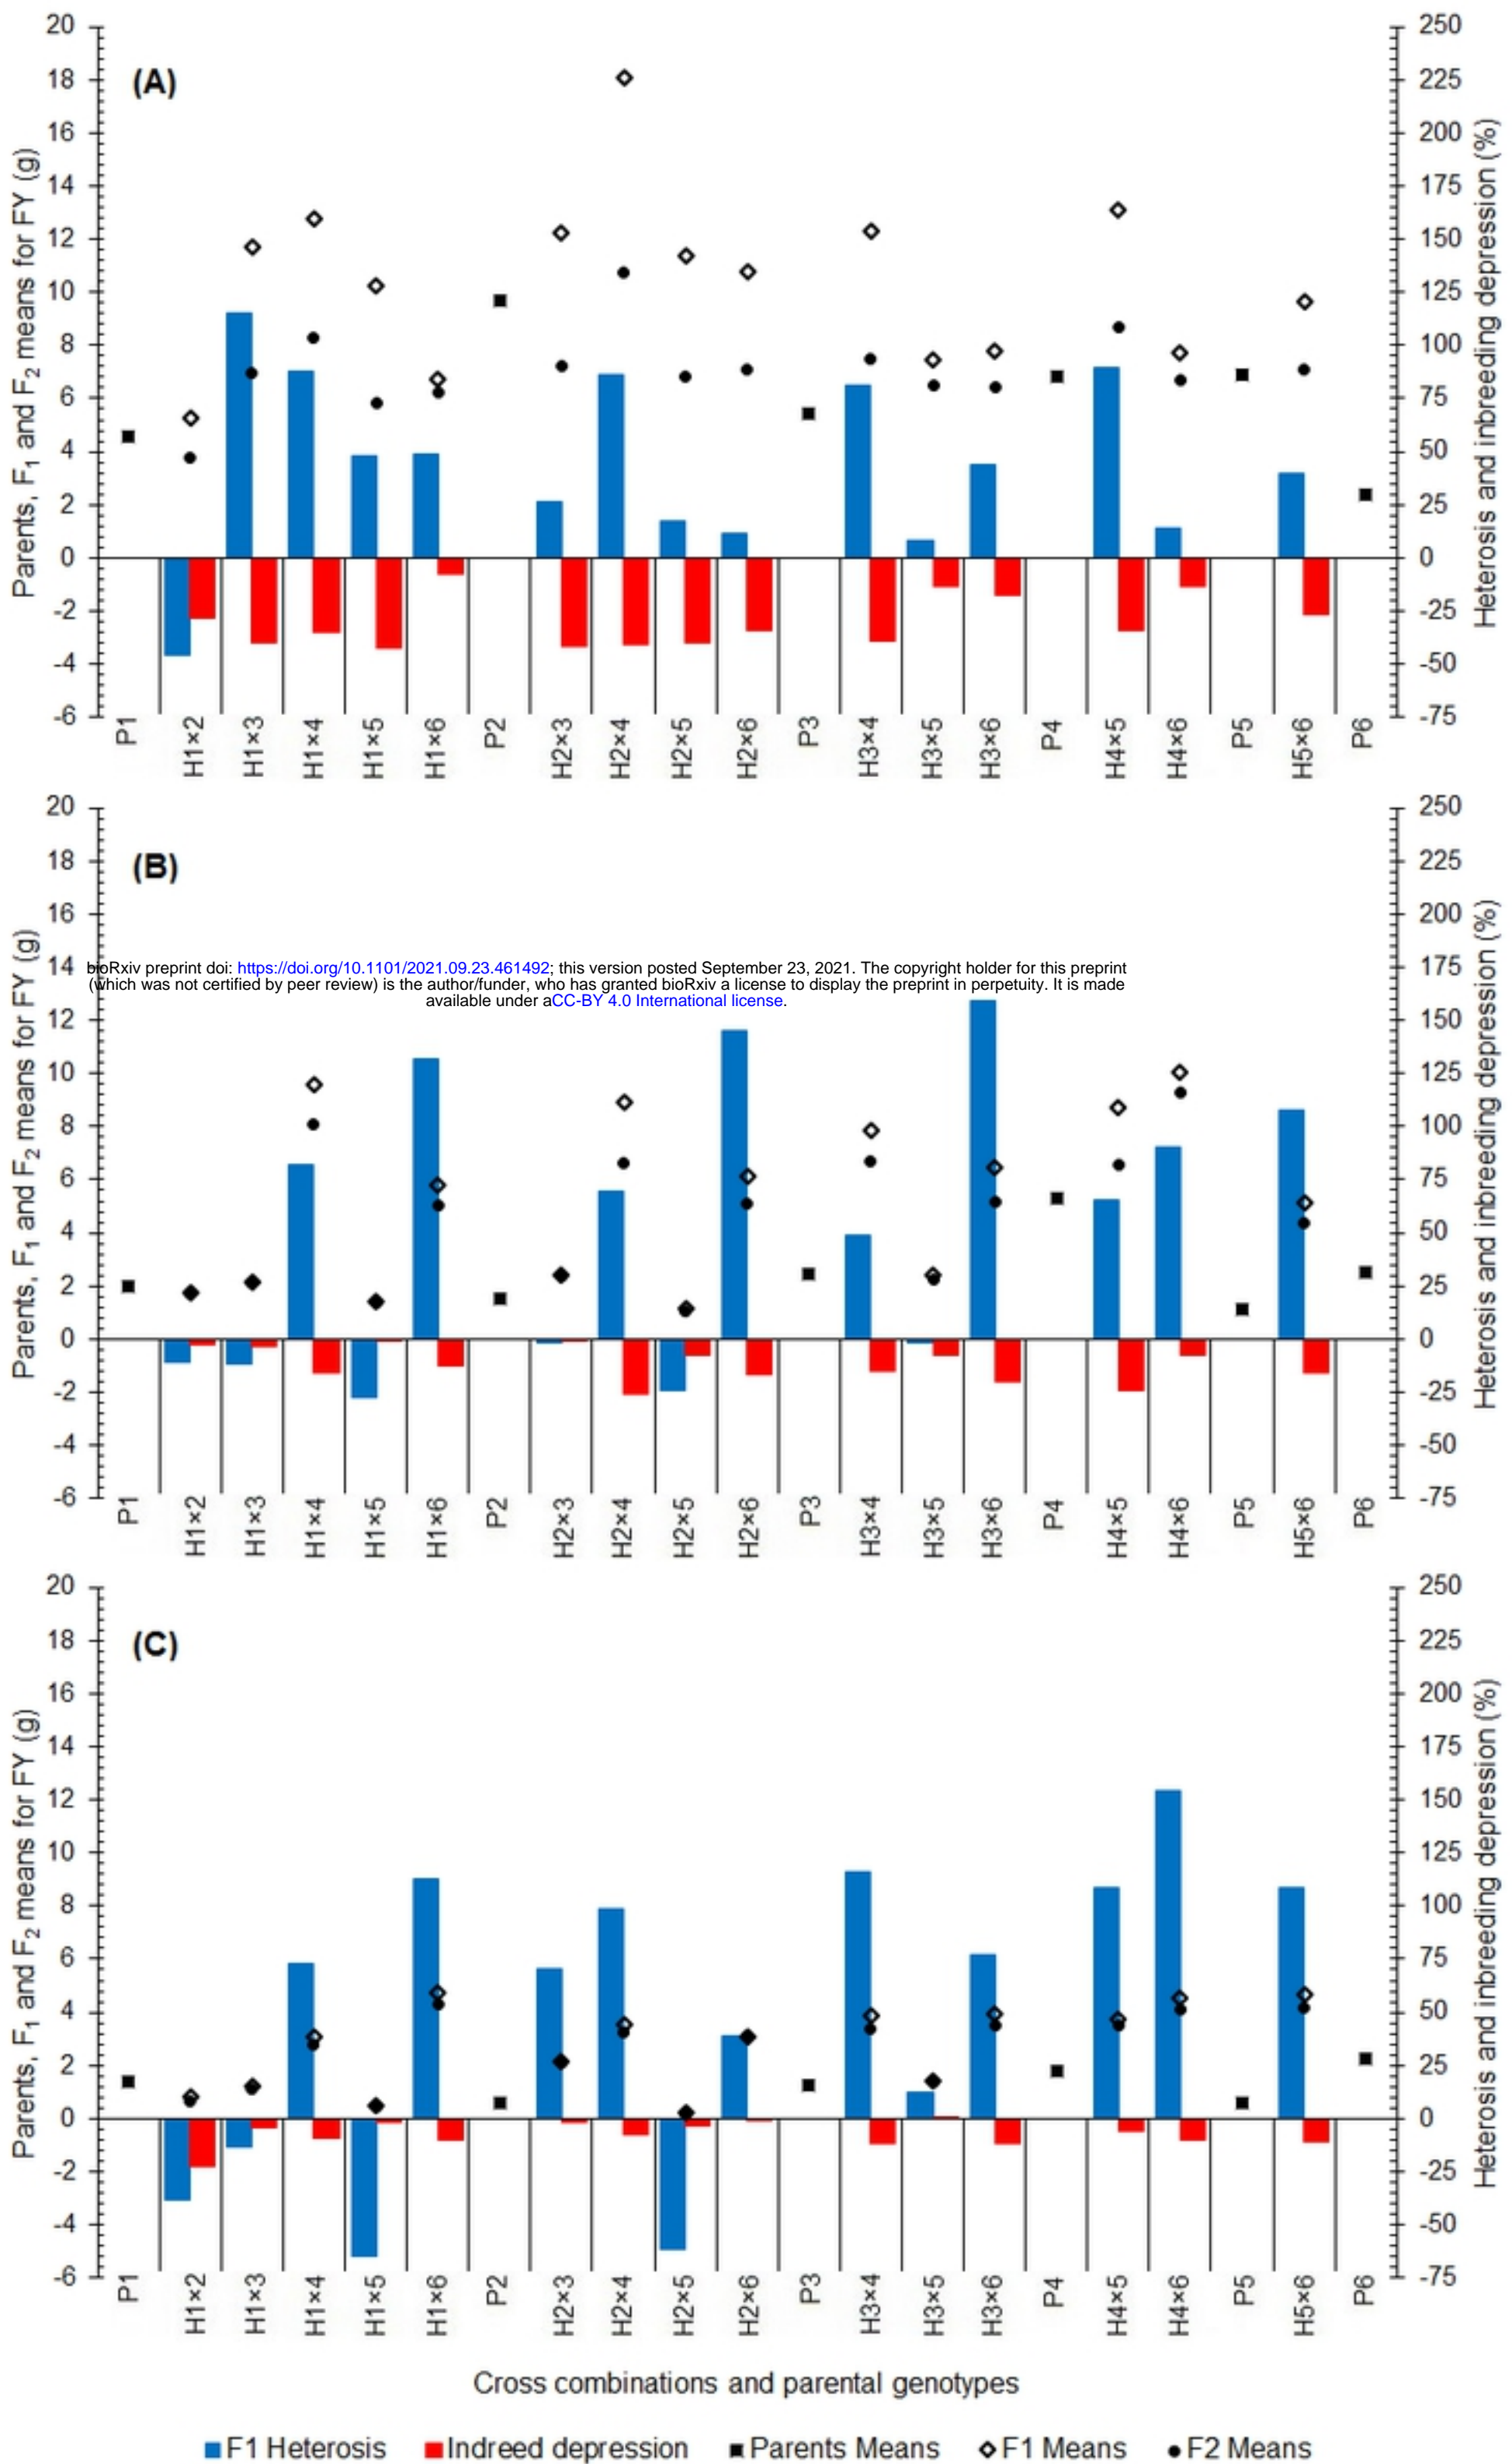

Figure 1

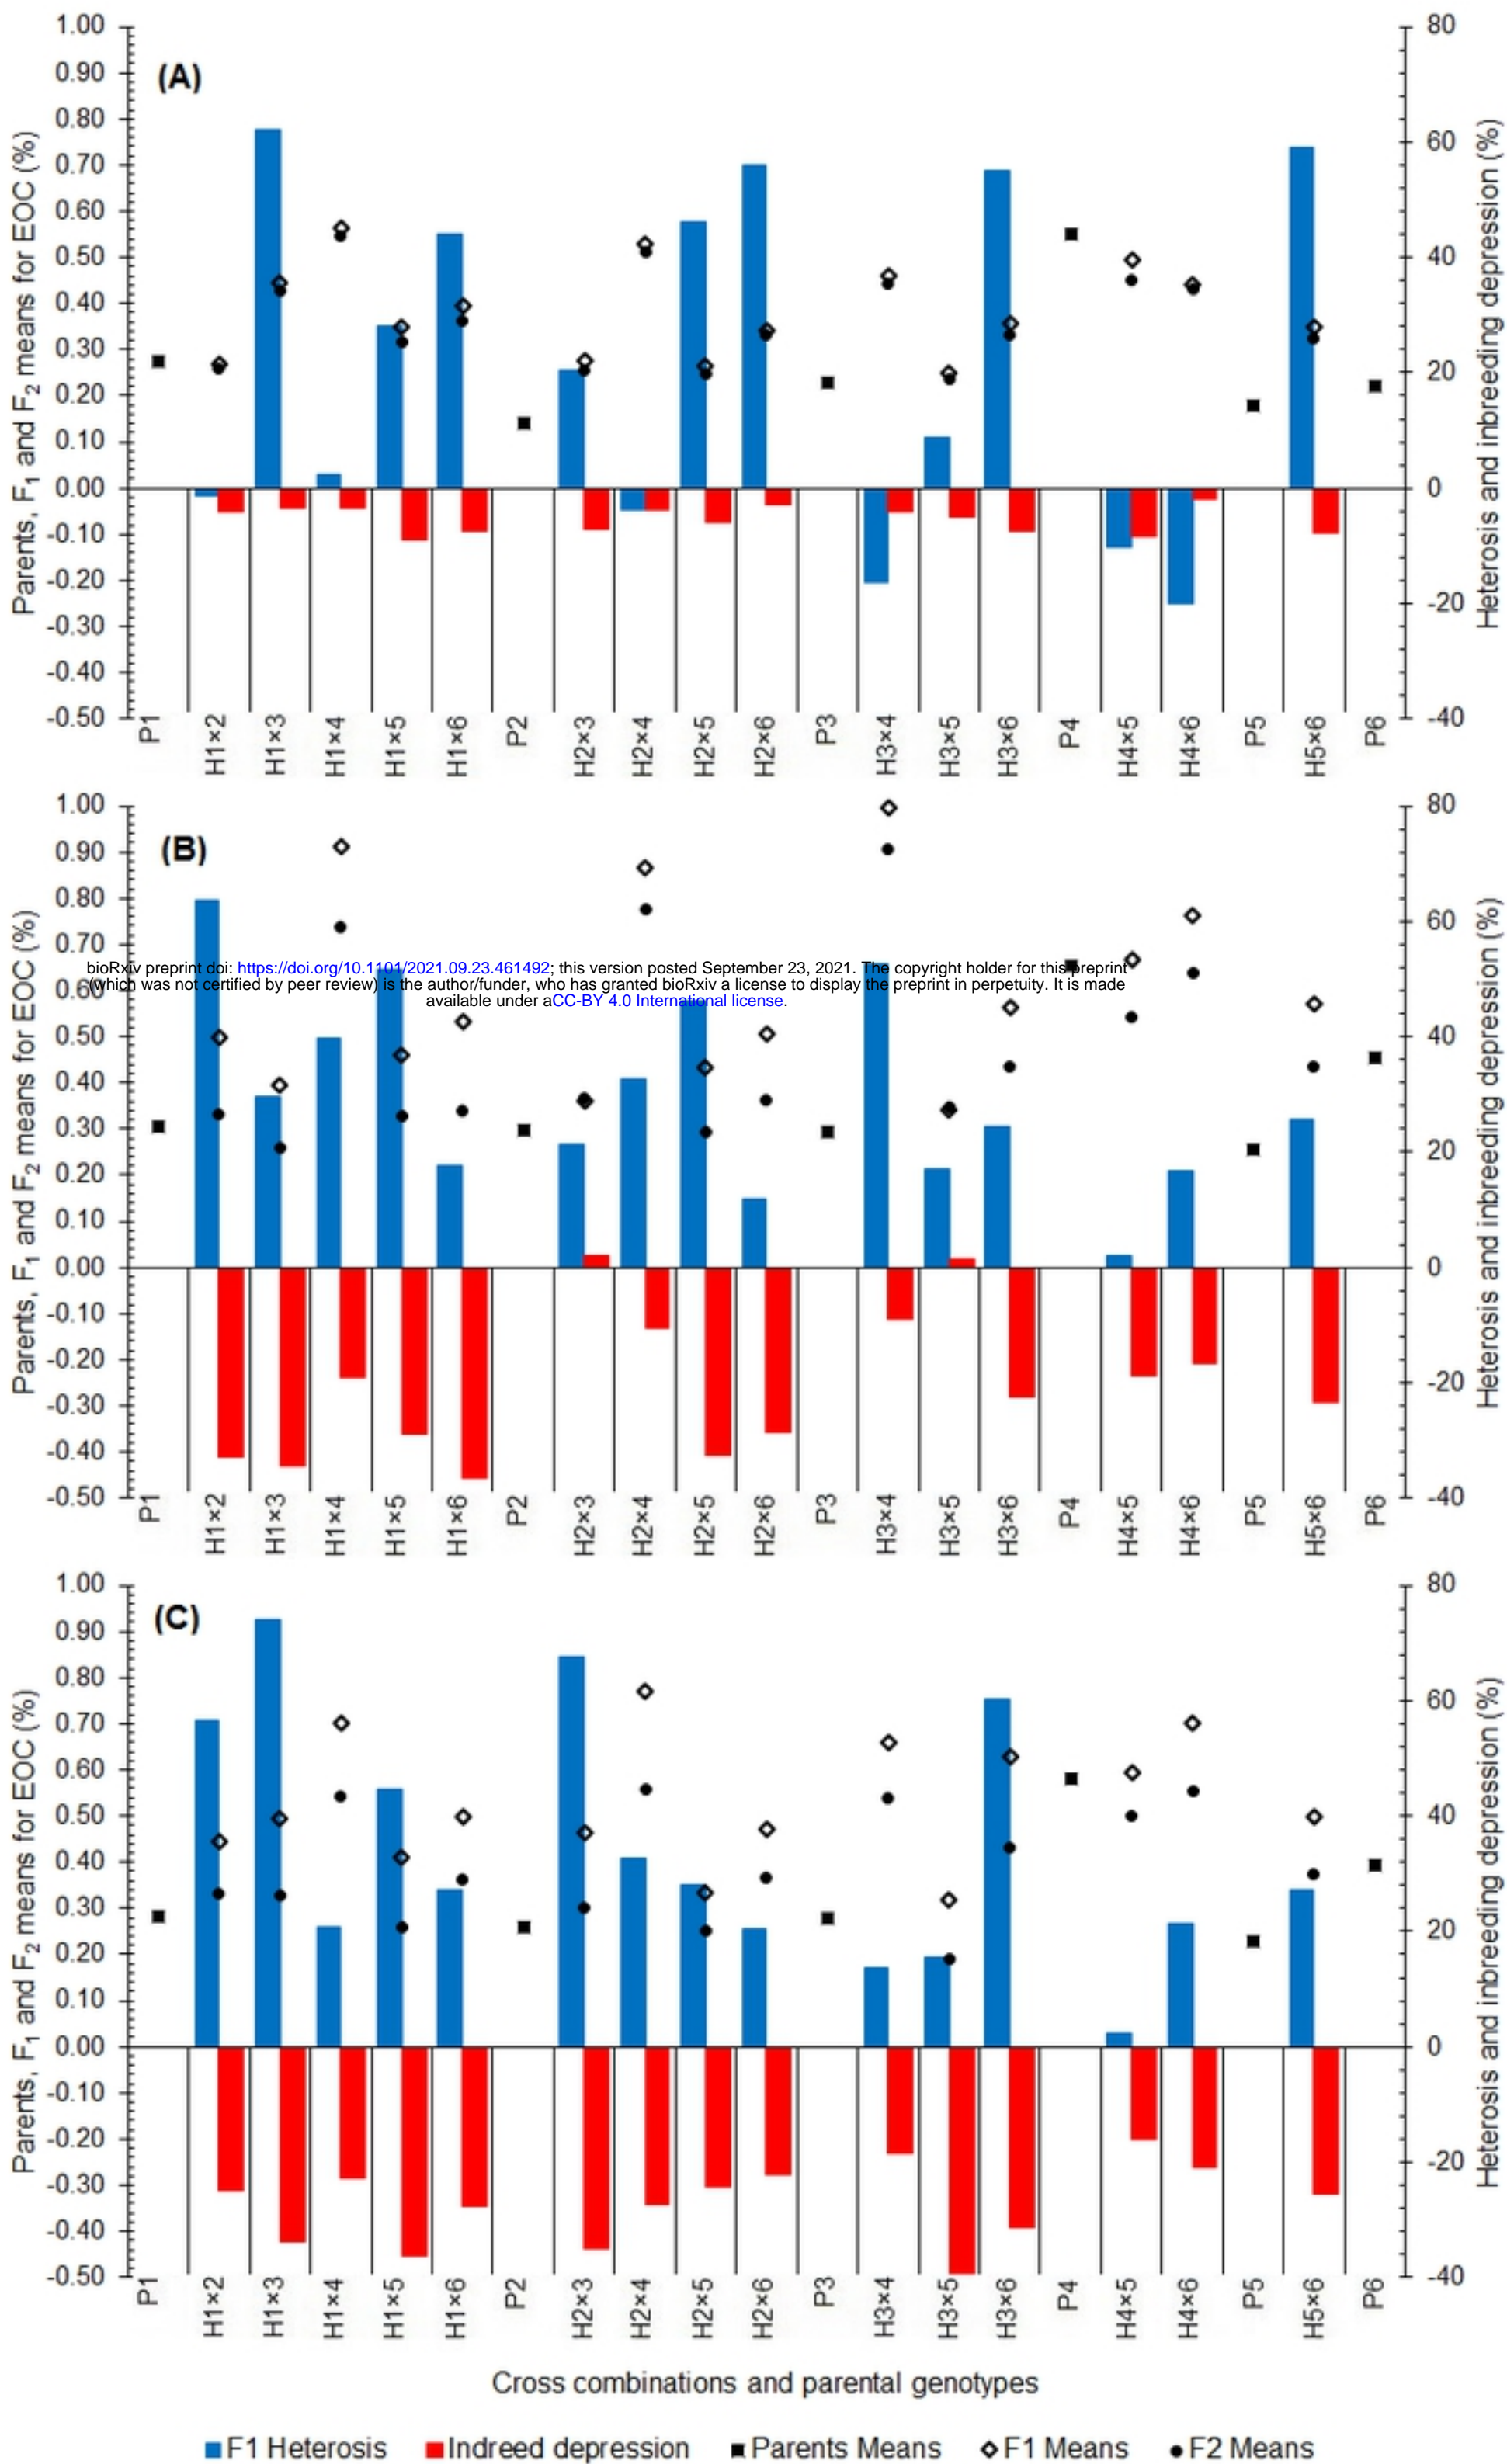

Figure 2

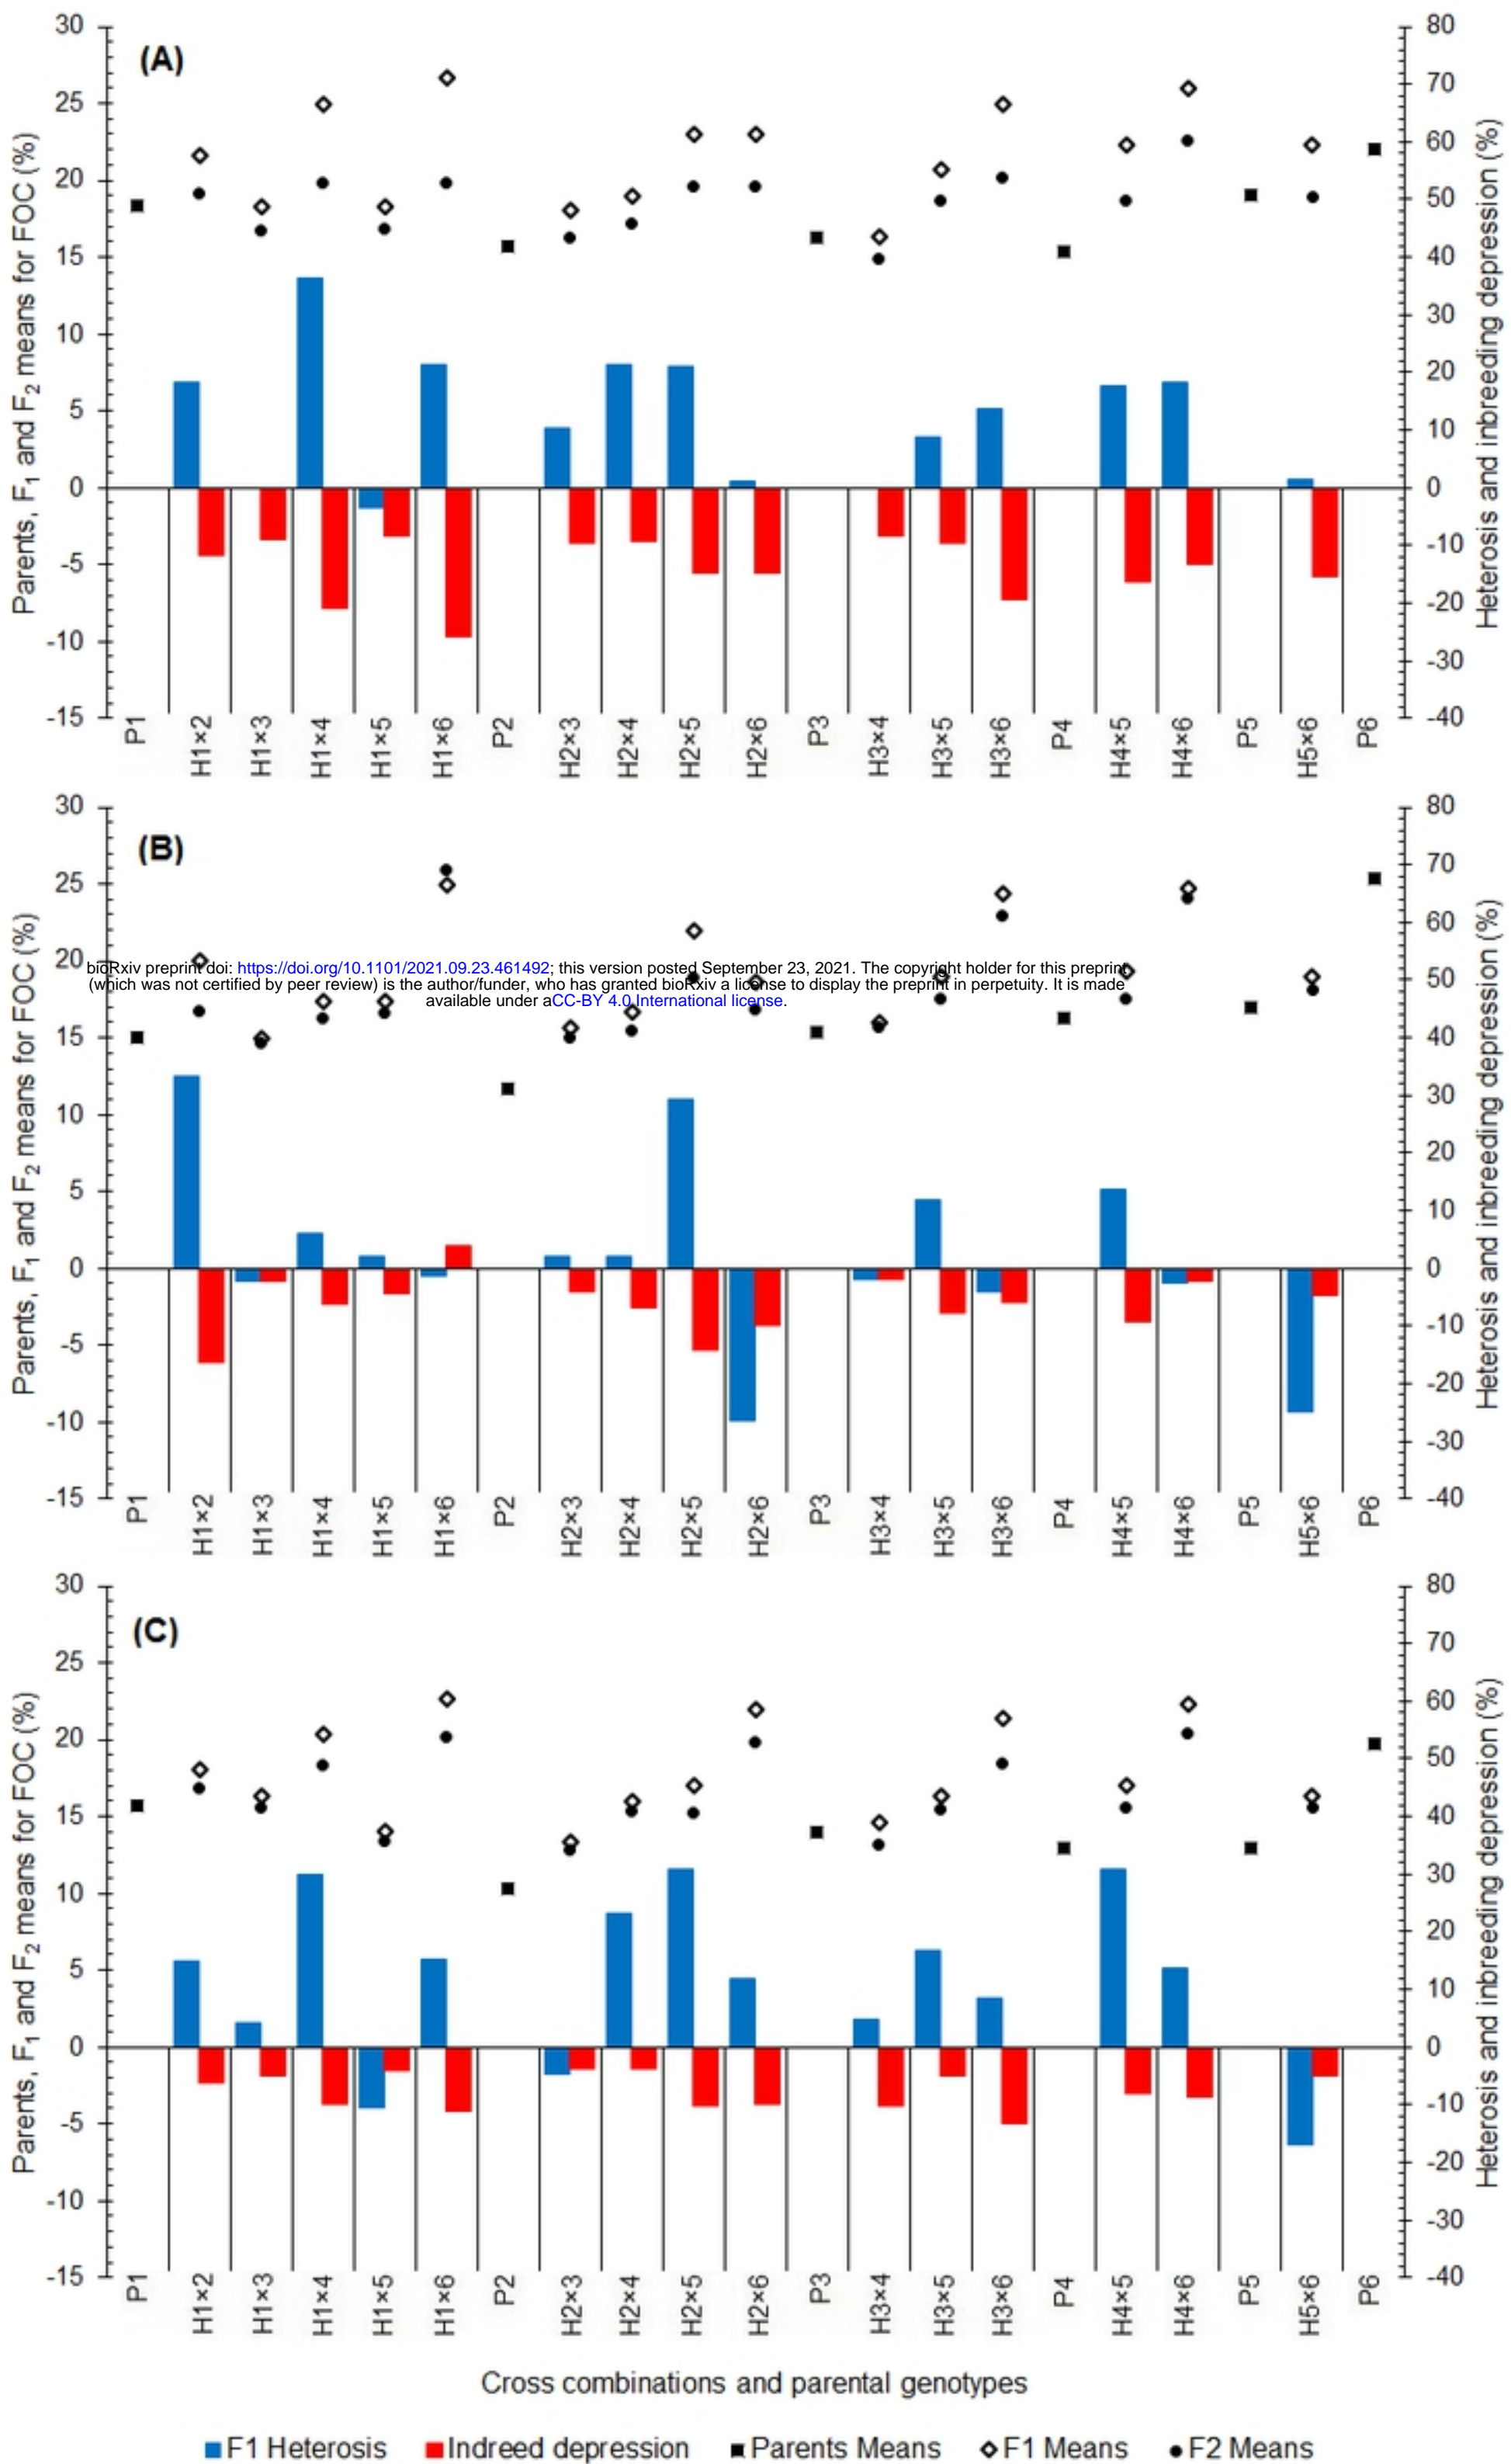

Figure 3

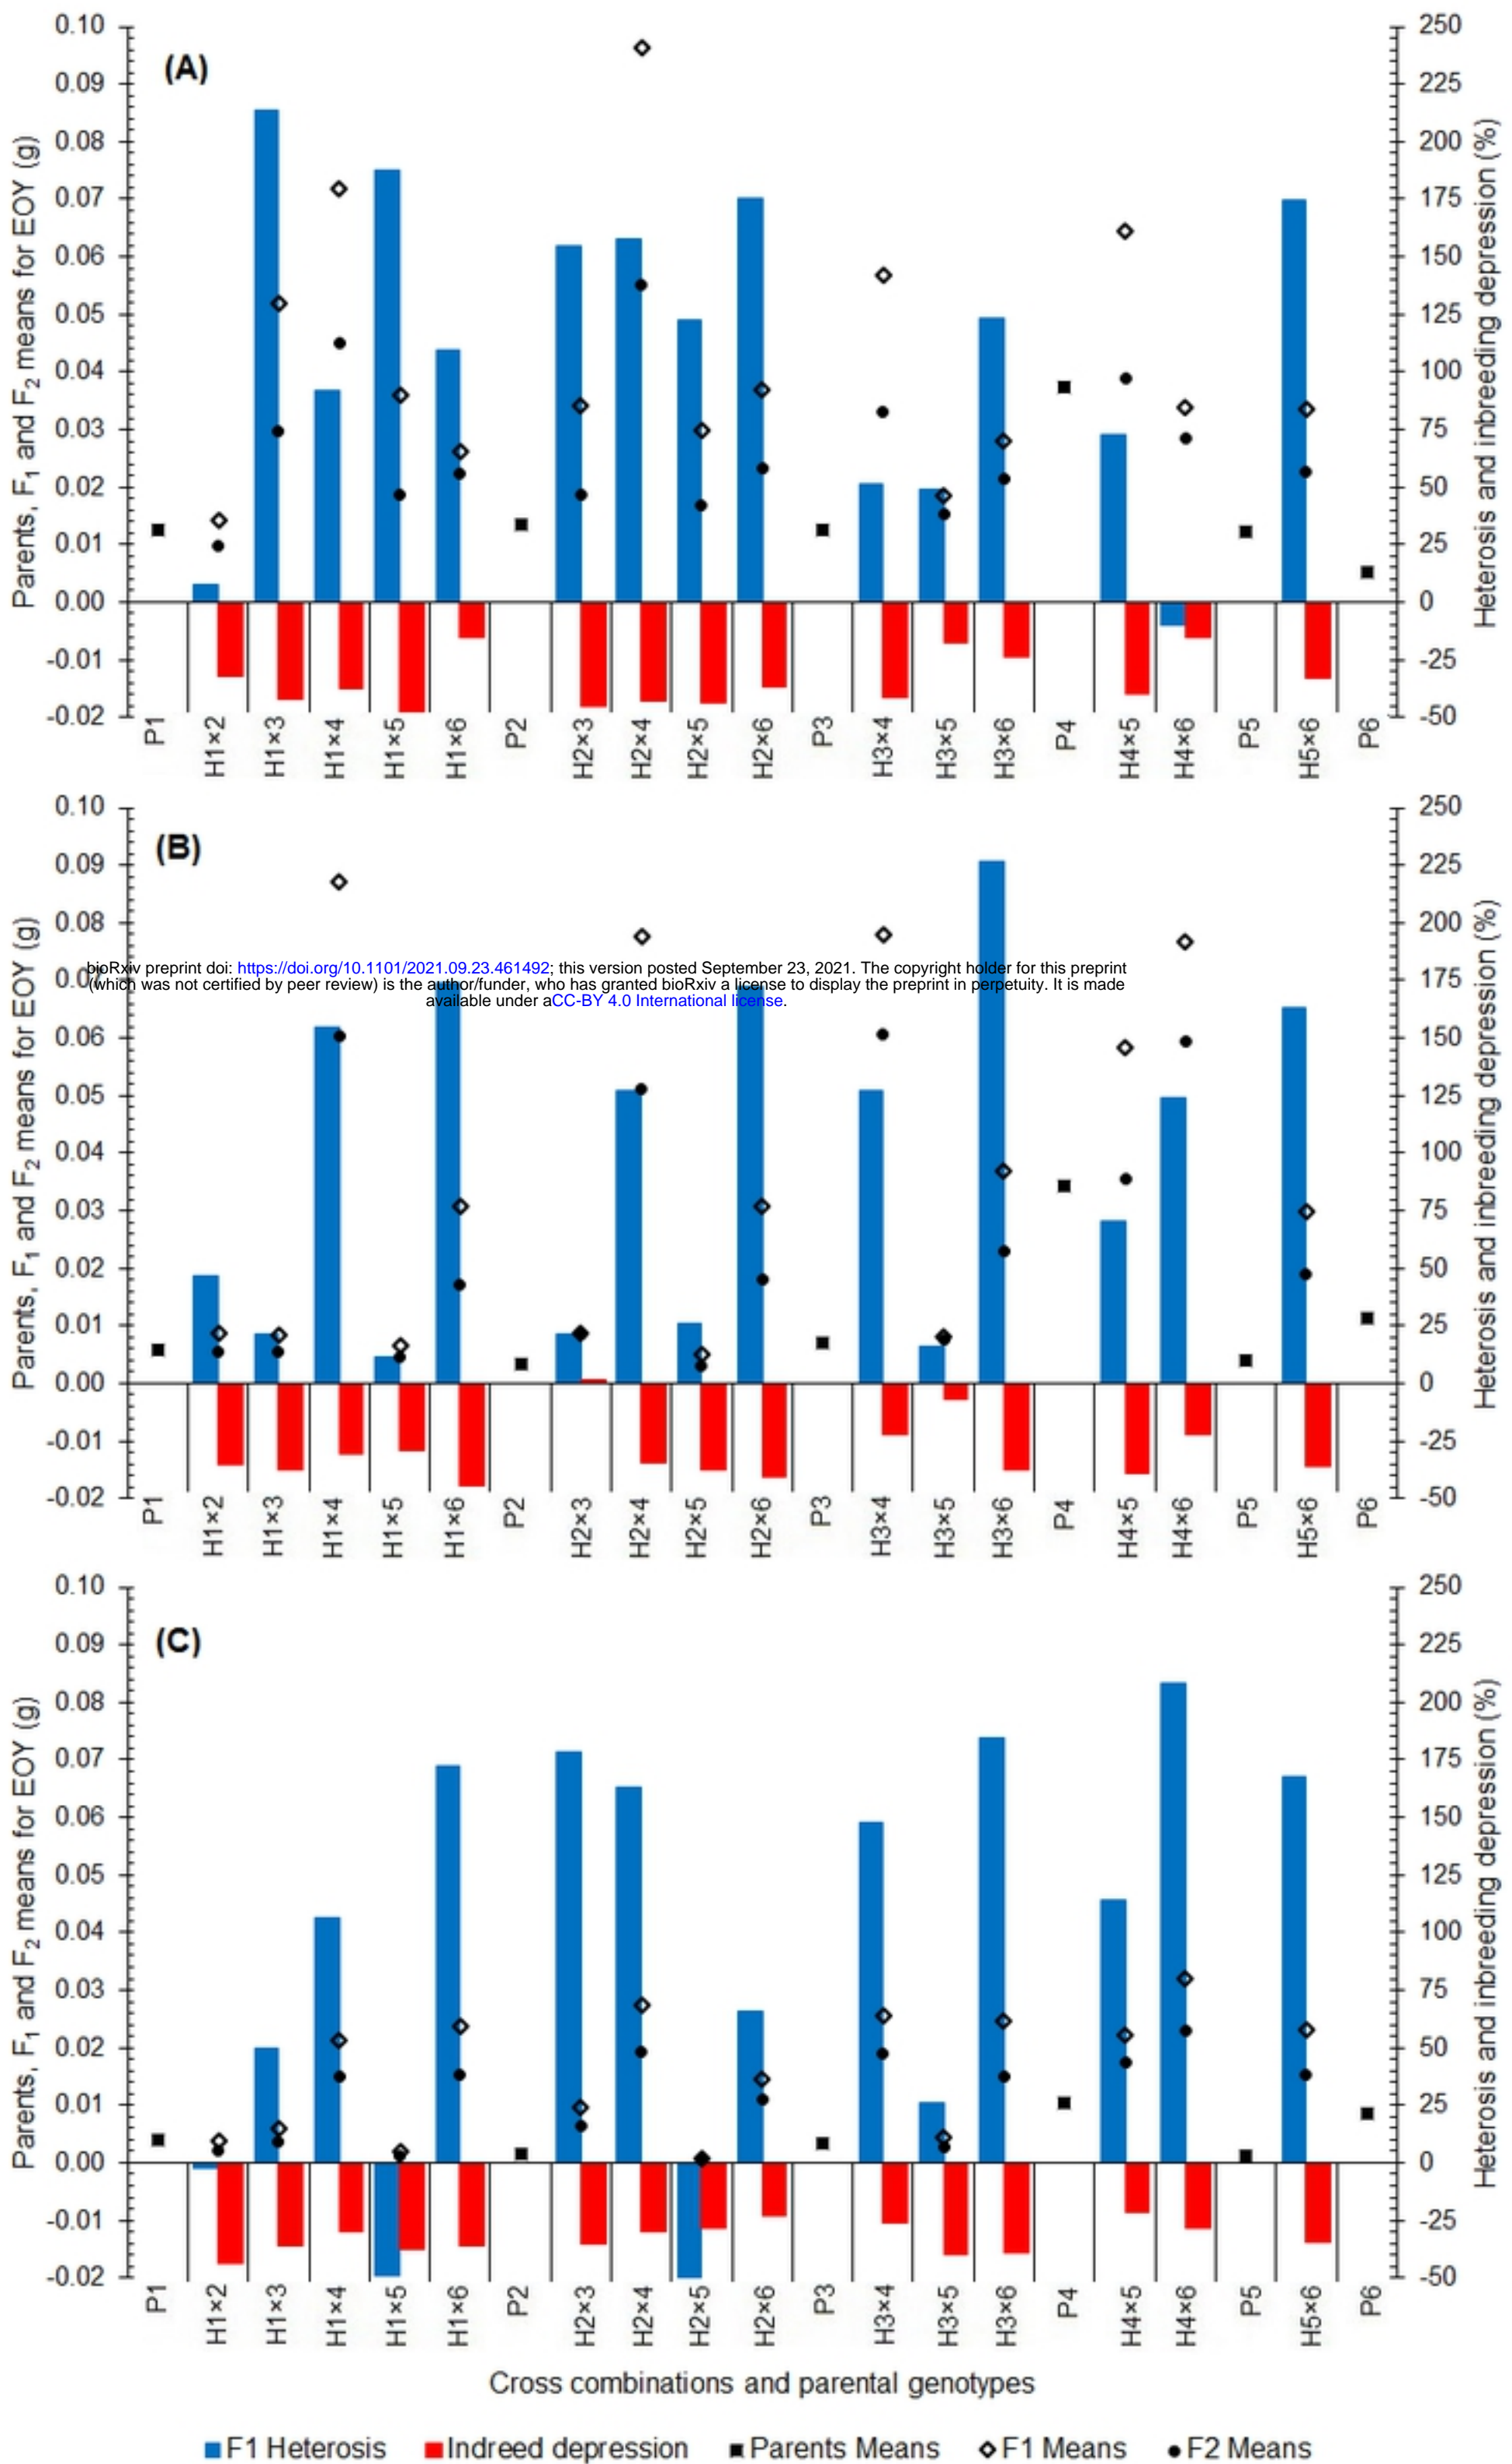

Figure 4

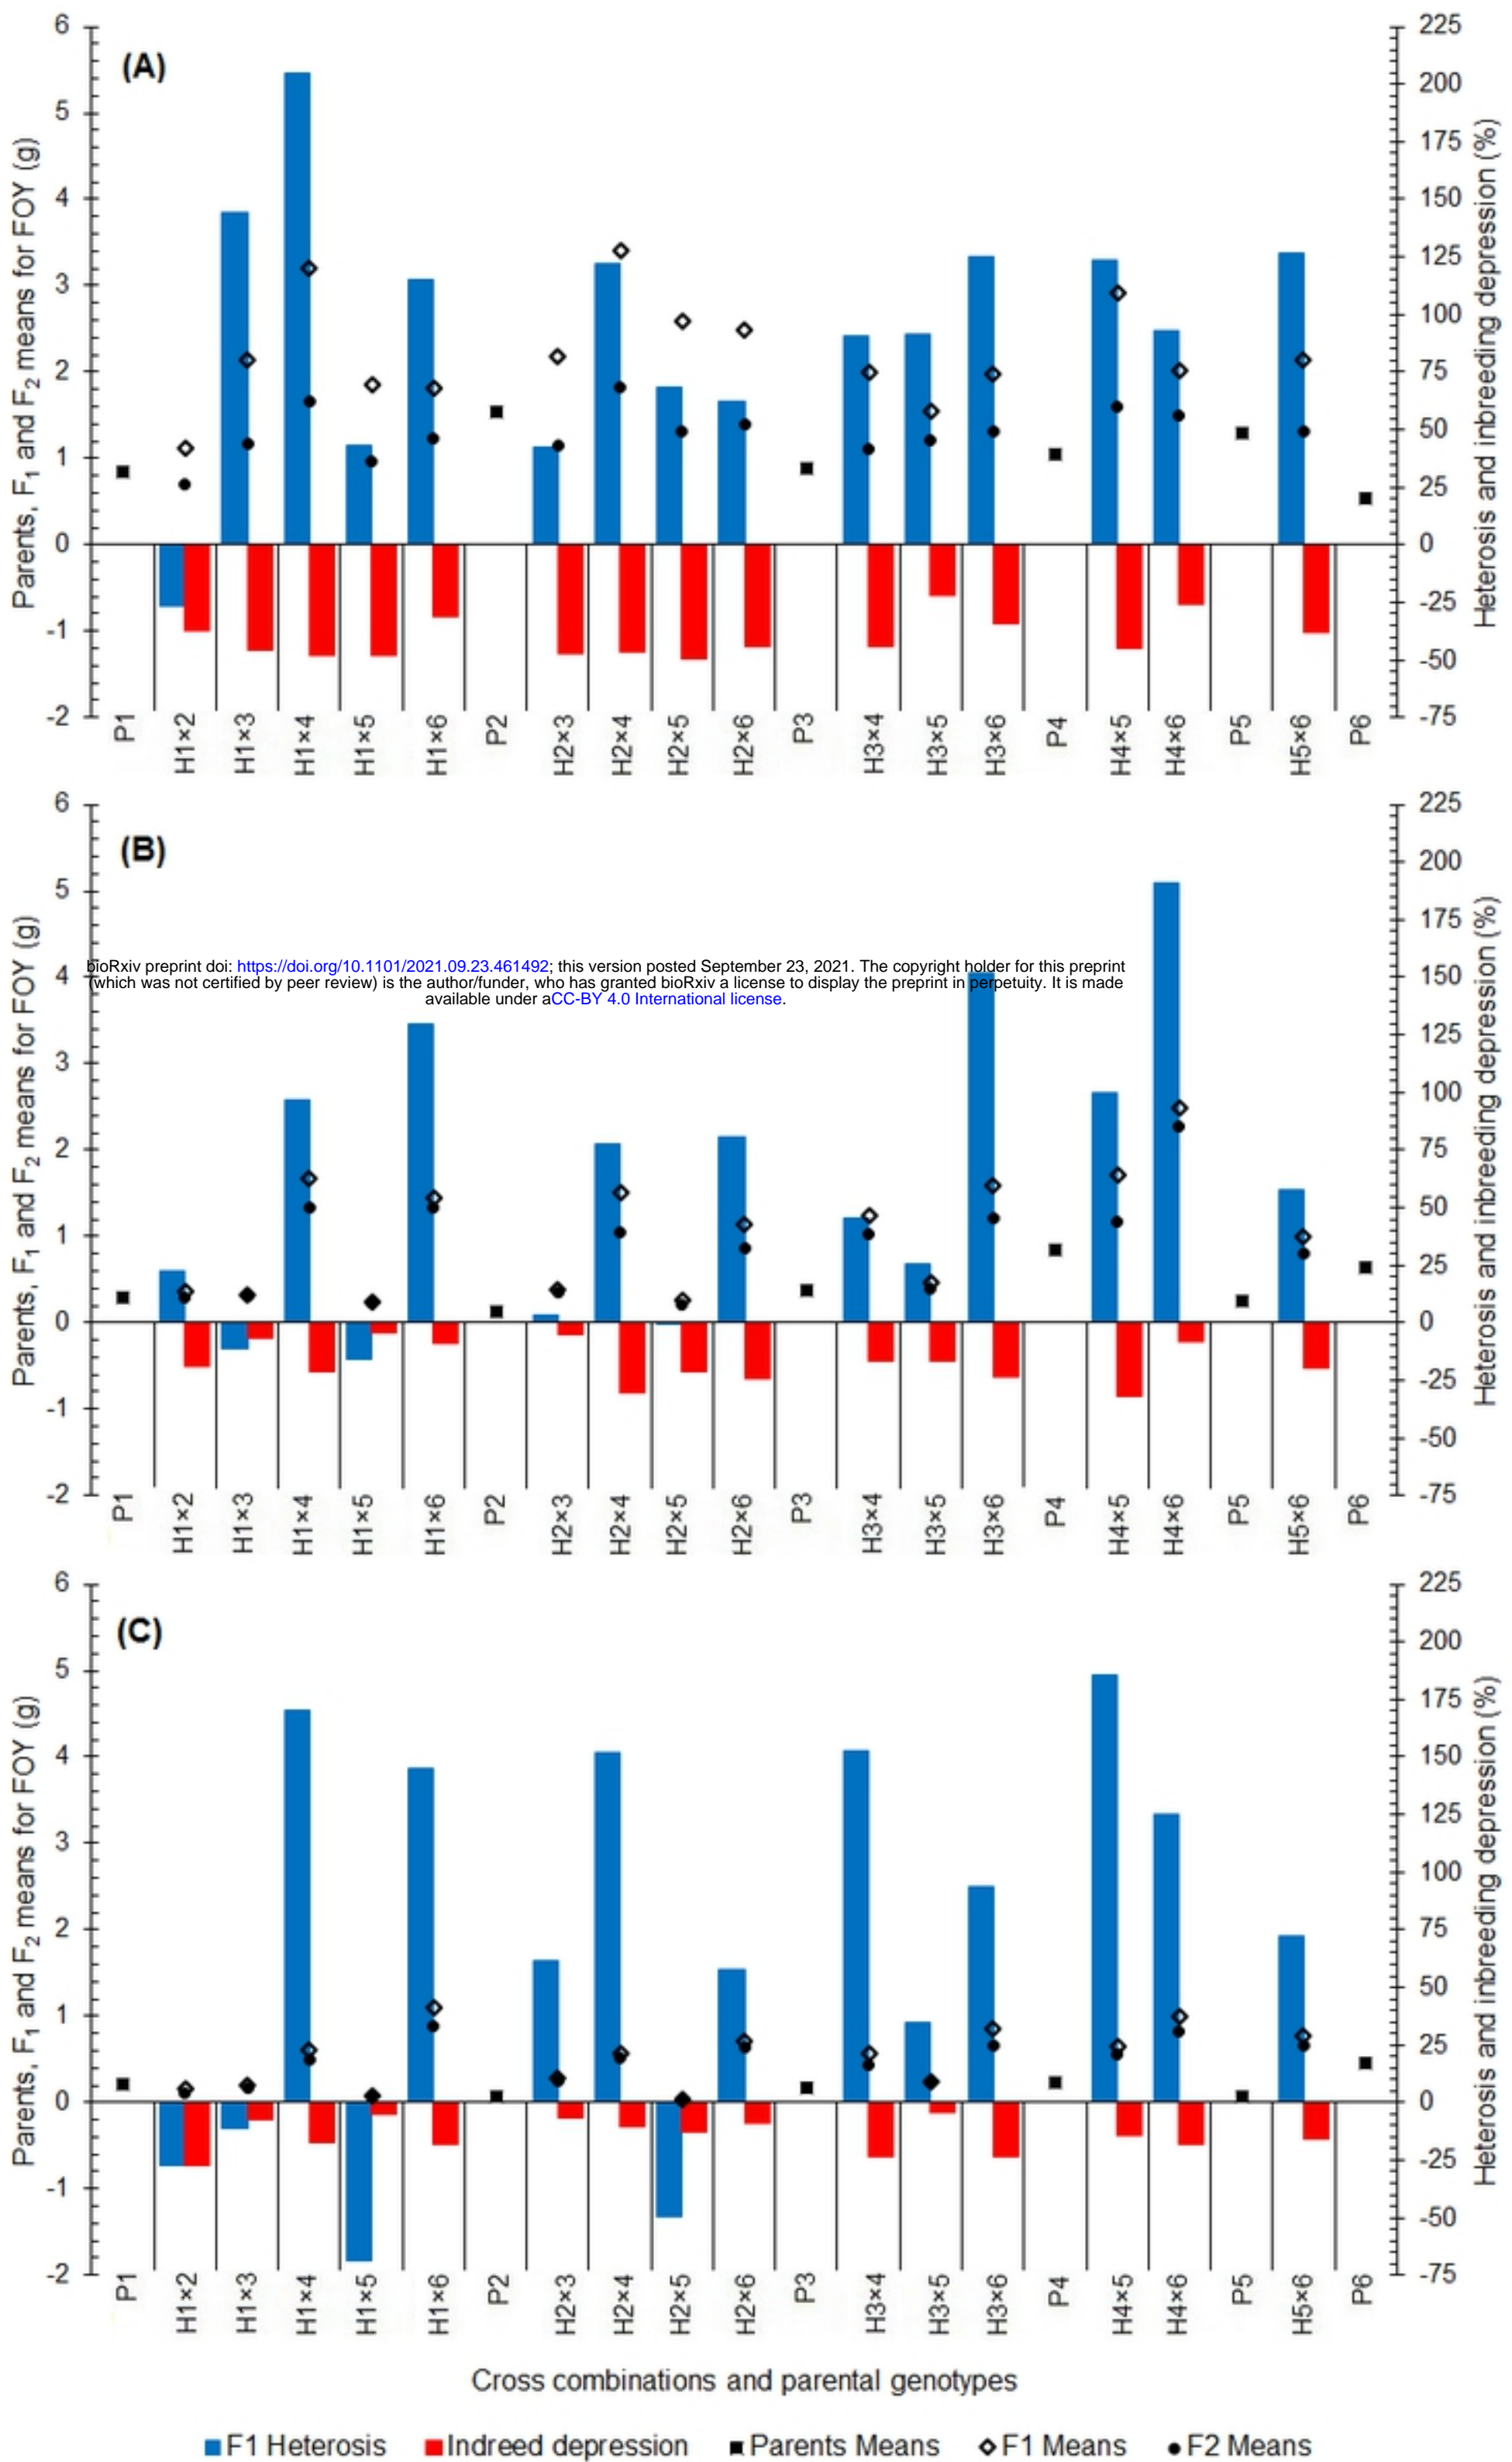

Figure 5
